# Supplementary material for: Features of Variable Number of Tandem Repeats in Yersinia pestis and the Development of a Hierarchical Genotyping Scheme
Source: PubMed Central journal article supplement (PMC3689786; doi:10.1371/journal.pone.0066567), 2013-06-21

Categorical  
**956 strains with 14 loci**

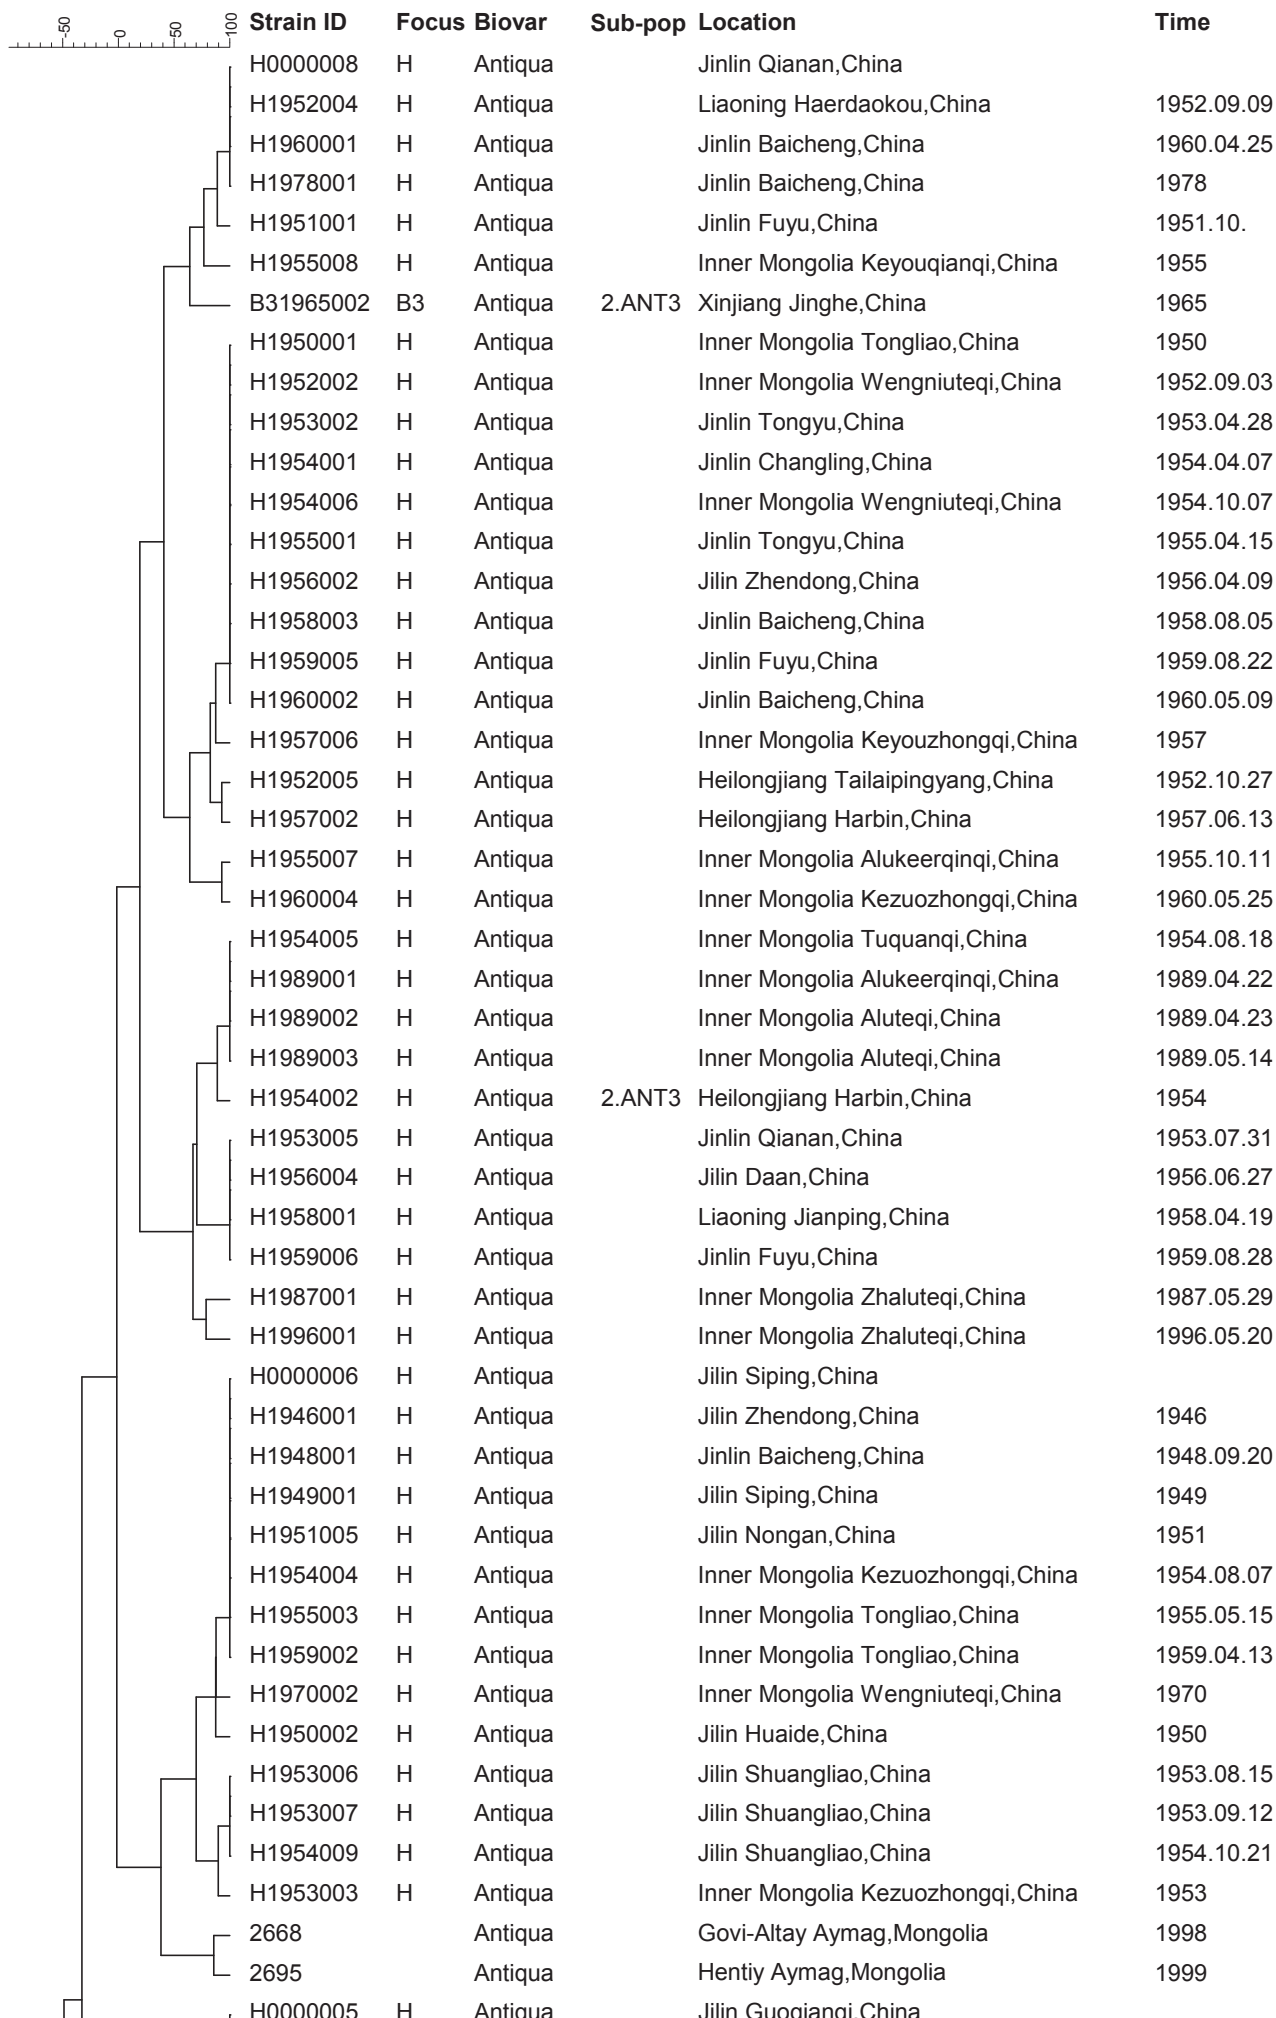

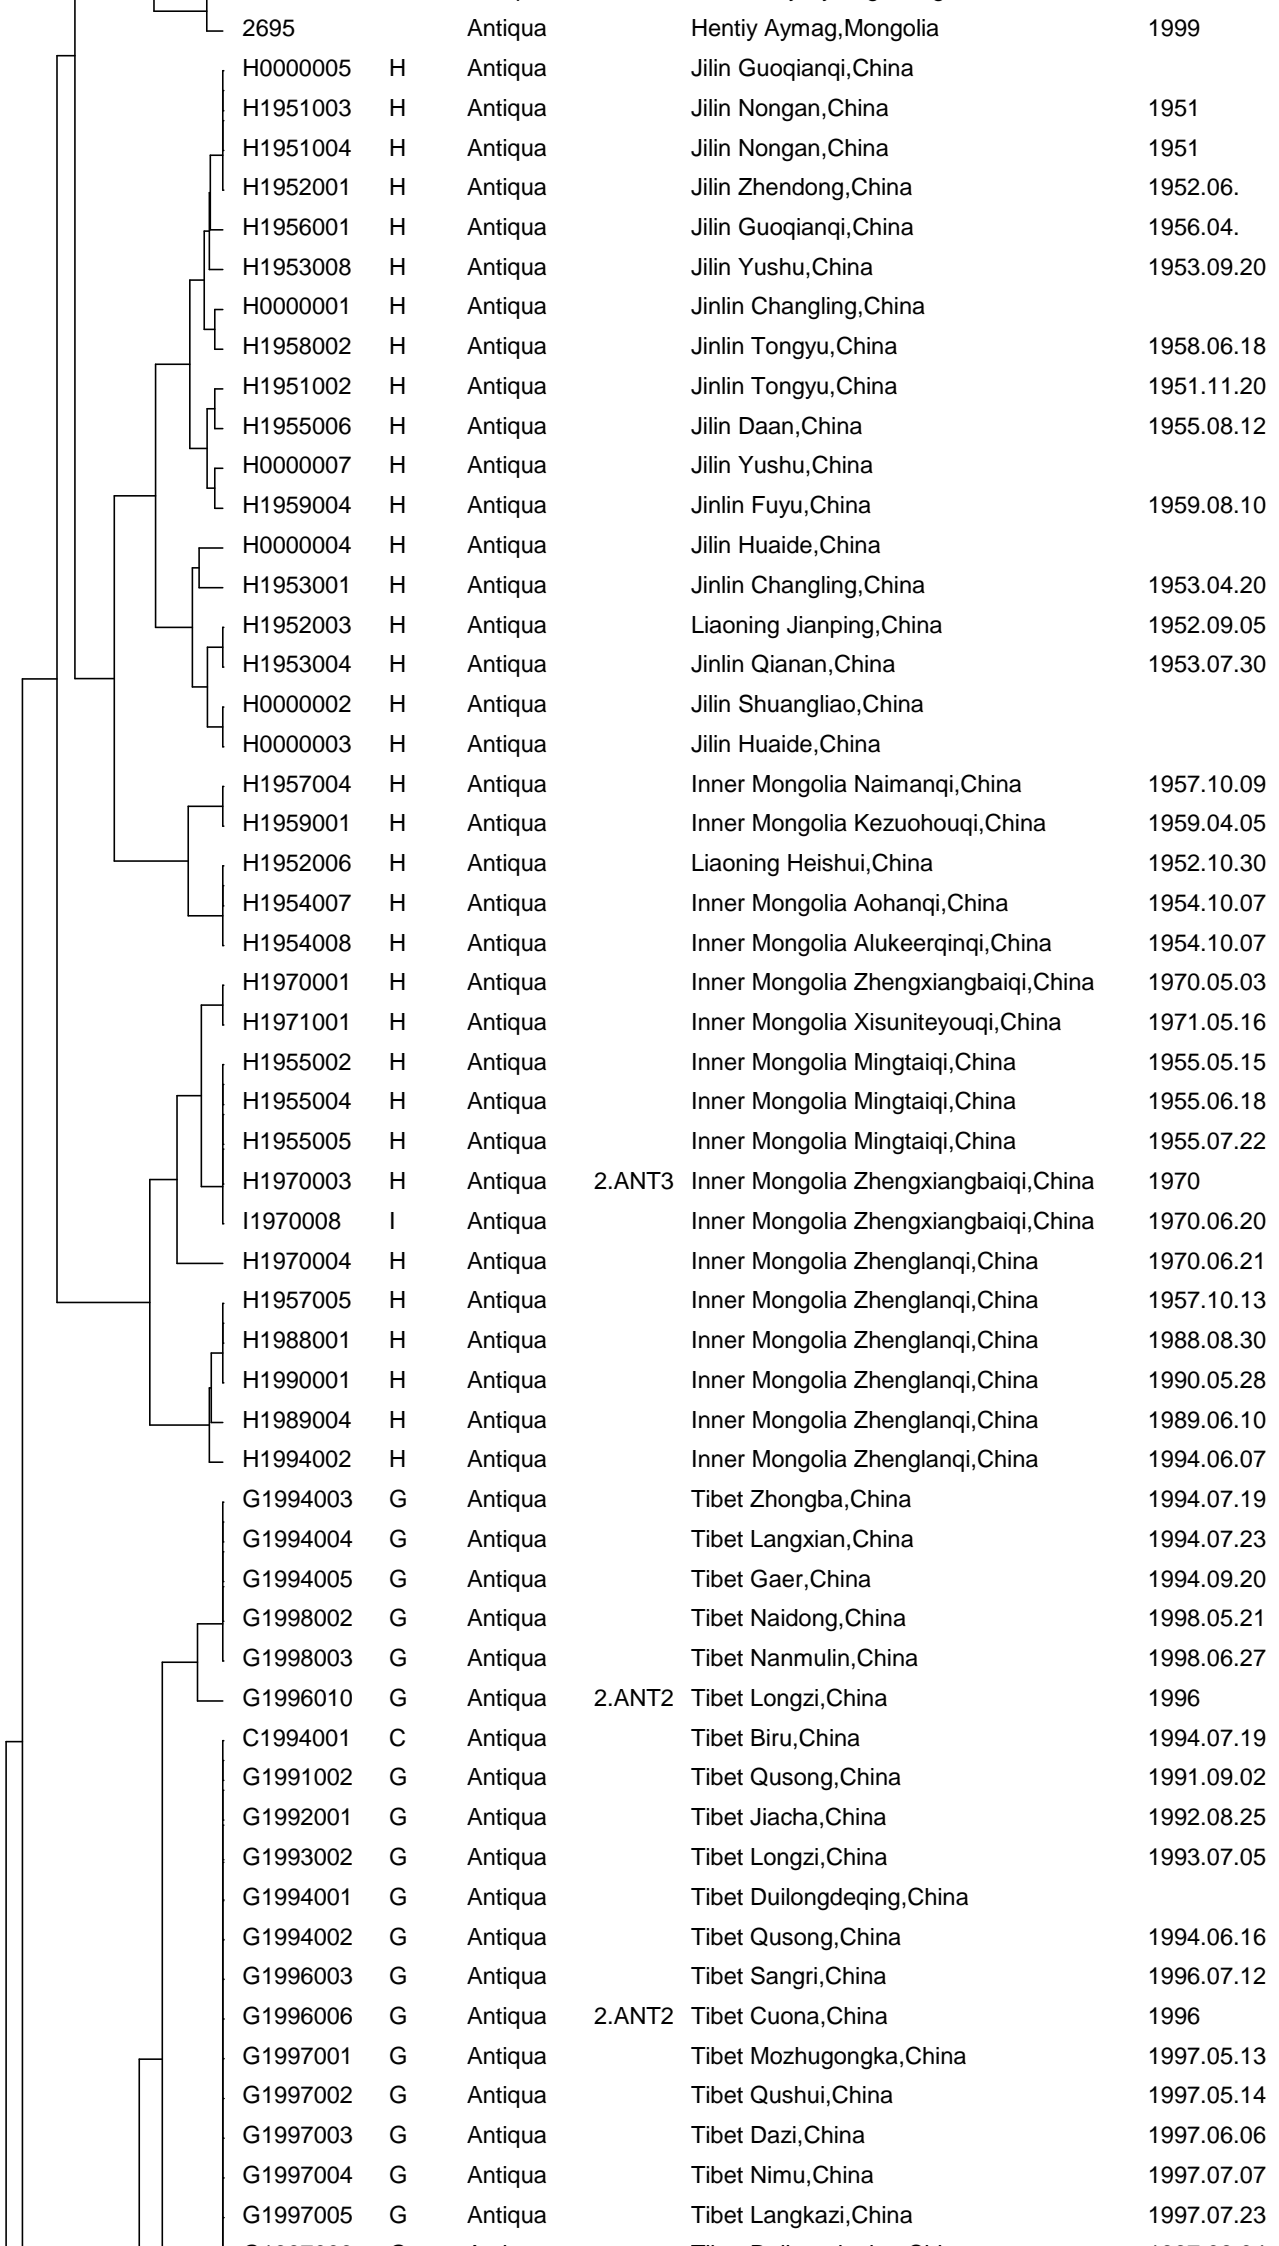

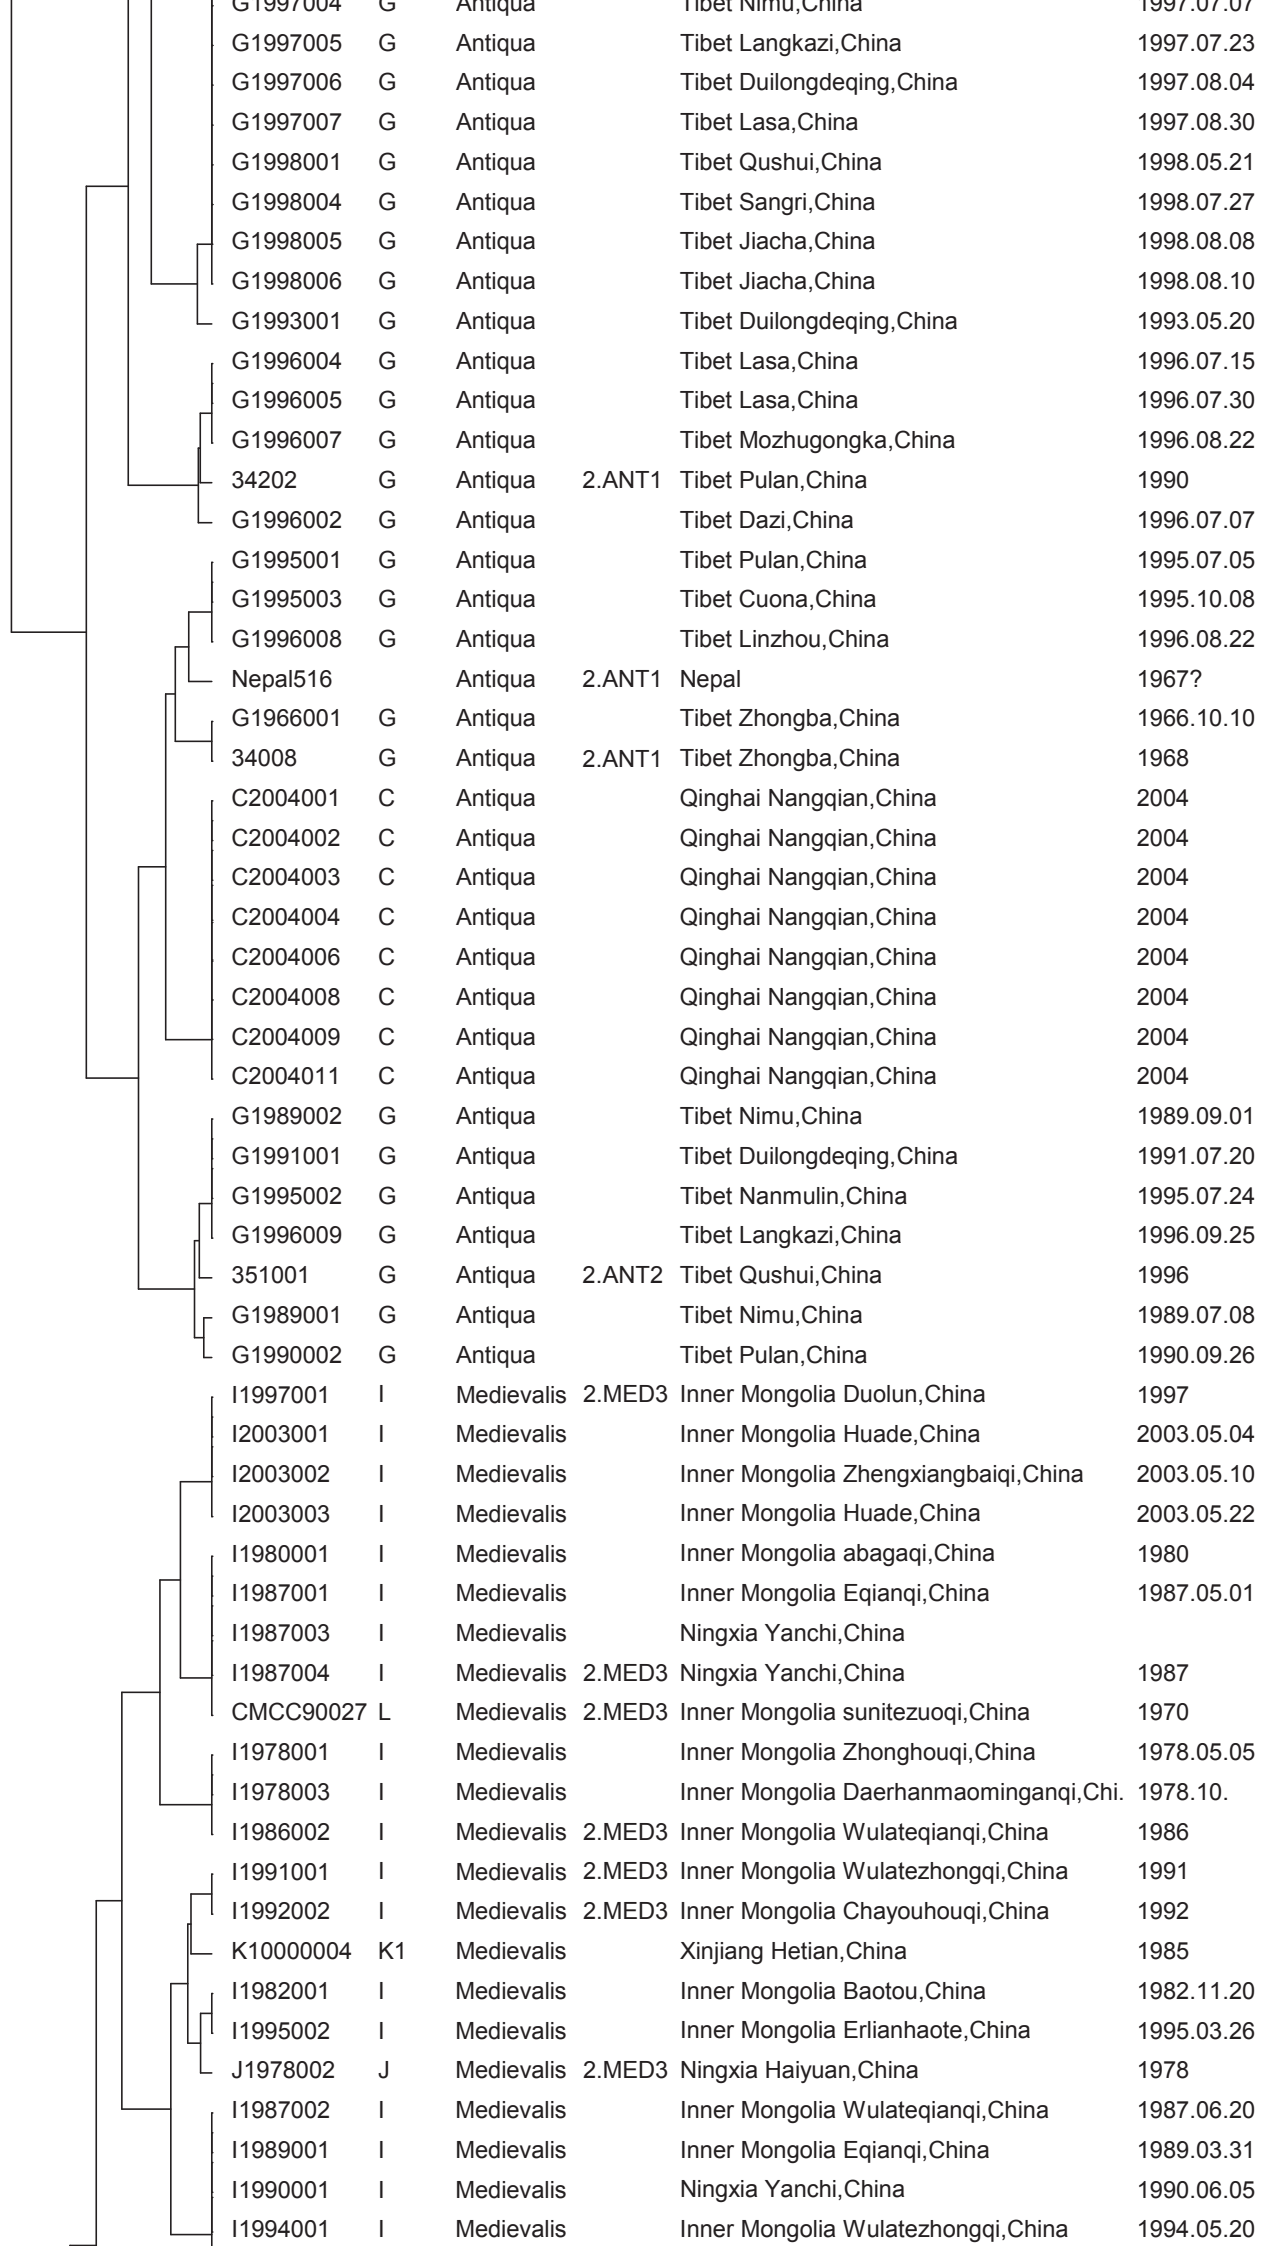

|          |   |            |        |                                        |            |
|----------|---|------------|--------|----------------------------------------|------------|
| I1990001 | I | Medievalis |        | Ningxia Yanchi,China                   | 1990.06.05 |
| I1994001 | I | Medievalis |        | Inner Mongolia Wulatezhongqi,China     | 1994.05.20 |
| I1996001 | I | Medievalis |        | Inner Mongolia Daerhanmaominganqi,Chi. | 1996.05.07 |
| I1974002 | I | Medievalis |        | Inner Mongolia Siwangziqi,China        | 1974       |
| I1979002 | I | Medievalis |        | Inner Mongolia Zhonghouqi,China        | 1979.12.06 |
| I1985001 | I | Medievalis |        | Inner Mongolia Baotou,China            | 1985.12.17 |
| I1992003 | I | Medievalis |        | Inner Mongolia Xisuniteyouqi,China     | 1992.09.22 |
| I1997003 | I | Medievalis | 2.MED3 | Inner Mongolia Siwangziqi,China        | 1997       |
| I2000001 | I | Medievalis |        | Inner Mongolia Siwangziqi,China        | 2000.10.11 |
| I2001004 | I | Medievalis |        | Inner Mongolia Eqianqi,China           | 2001.05.20 |
| I2003004 | I | Medievalis |        | Inner Mongolia Wulatezhongqi,China     | 2003.05.22 |
| I1997002 | I | Medievalis |        | Shanxi Dingbian,China                  | 1997.04.24 |
| J1962002 | J | Medievalis |        | Ningxia Haiyuan,China                  | 1962.08.19 |
| J1964001 | J | Medievalis |        | Ningxia Xiji,China                     | 1964.06.01 |
| J1977004 | J | Medievalis |        | Gansu Jingyuan,China                   | 1977.07.03 |
| J1977006 | J | Medievalis |        | Ningxia Haiyuan,China                  | 1977.10.29 |
| J1977005 | J | Medievalis |        | Ningxia Guyuan,China                   | 1977.07.25 |
| J1964002 | J | Medievalis |        | Ningxia Xiji,China                     | 1964.08.01 |
| J1978001 | J | Medievalis |        | Ningxia Guyuan,China                   | 1978.04.20 |
| I1969003 | I | Medievalis | 2.MED3 | Ningxia Lingwu,China                   | 1969       |
| J1962001 | J | Medievalis |        | Ningxia Haiyuan,China                  | 1962.08.19 |
| J1963001 | J | Medievalis |        | Gansu Tianzhu,China                    | 1963.05.06 |
| J1965001 | J | Medievalis |        | Ningxia Haiyuan,China                  | 1965.06.25 |
| J1977002 | J | Medievalis |        | Gansu Jingyuan,China                   | 1977.06.02 |
| J1977003 | J | Medievalis | 2.MED3 | Gansu Jingyuan,China                   | 1977       |
| I1969002 | I | Medievalis |        | Ningxia Lingwu,China                   | 1969.06.29 |
| J1963002 | J | Medievalis | 2.MED3 | Gansu Huining,China                    | 1963       |
| J1963003 | J | Medievalis |        | Gansu Huining,China                    | 1963.07.09 |
| J1963004 | J | Medievalis |        | Gansu Huining,China                    | 1963.08.15 |
| I1970002 | I | Medievalis |        | Inner Mongolia Etuoqeqi,China          | 1970.04.29 |
| I1970010 | I | Medievalis |        | Ningxia Yanchi,China                   | 1970.06.22 |
| I1976001 | I | Medievalis |        | Ningxia Yinchuan,China                 | 1976.07.07 |
| I1970004 | I | Medievalis |        | Inner Mongolia Etuoqeqi,China          | 1970.05.18 |
| I1969001 | I | Medievalis |        | Inner Mongolia Etuoqeqi,China          | 1969.04.20 |
| I1970001 | I | Medievalis |        | Inner Mongolia Etuoqeqi,China          | 1970.04.20 |
| I1970003 | I | Medievalis |        | Inner Mongolia Etuoqeqi,China          | 1970.05.16 |
| I1970005 | I | Medievalis | 2.MED3 | Inner Mongolia Etuoqeqi,China          | 1970       |
| I1970006 | I | Medievalis |        | Ningxia Taole,China                    | 1970.06.09 |
| I1970007 | I | Medievalis |        | Ningxia Taole,China                    | 1970.06.09 |
| I1970011 | I | Medievalis |        | Inner Mongolia Etuoqeqi,China          | 1970.06.30 |
| I1972002 | I | Medievalis |        | Inner Mongolia Guyang,China            | 1972.01.18 |
| I1974001 | I | Medievalis |        | Ningxia Lingwu,China                   | 1974.08.21 |
| I1975001 | I | Medievalis | 2.MED3 | Ningxia Taole,China                    | 1975       |
| H1972001 | H | Medievalis | 2.MED3 | Inner Mongolia Baochang,China          | 1972       |
| I1971002 | I | Medievalis |        | Hebei Kangbao,China                    |            |
| I1979001 | I | Medievalis |        | Inner Mongolia Xisuniteyouqi,China     | 1979.06.18 |
| I1986001 | I | Medievalis |        | Inner Mongolia Wulateqianqi,China      | 1986.07.11 |
| I1989002 | I | Medievalis |        | Inner Mongolia Etuoqeqi,China          | 1989.12.09 |
| I1991002 | I | Medievalis |        | Inner Mongolia Daerhanmaominganqi,Chi. | 1991.10.28 |
| I1994005 | I | Medievalis |        | Hebei Kangbao,China                    | 1994.11.06 |
| I1995001 | I | Medievalis |        | Hebei Kangbao,China                    | 1995.01.07 |
| I1995003 | I | Medievalis |        | Inner Mongolia Shangdu,China           | 1995.03.26 |
| I1995005 | I | Medievalis |        | Inner Mongolia Zhenghuangqi,China      | 1995.05.25 |
| I1995006 | I | Medievalis |        | Hebei Kangbao,China                    | 1995.11.04 |
| I1998001 | I | Medievalis | 2.MED3 | Inner Mongolia Wushenqi,China          | 1998       |
| I2000002 | I | Medievalis |        | Shanxi Dingbian,China                  | 2000.12.08 |
| I2001001 | I | Medievalis | 2.MED3 | Shanxi Dingbian,China                  | 2001       |

|           |    |            |        |                                    |            |
|-----------|----|------------|--------|------------------------------------|------------|
| I2000002  | I  | Medievalis |        | Shanxi Dingbian,China              | 2000.12.08 |
| I2001001  | I  | Medievalis | 2.MED3 | Shanxi Dingbian,China              | 2001       |
| I1992001  | I  | Medievalis |        | Inner Mongolia Zhenghuangqi,China  | 1992.05.30 |
| H1956003  | H  | Medievalis |        | Jilin Daan,China                   | 1956.06.17 |
| H1957003  | H  | Medievalis |        | Jilin Yushu,China                  | 1957.07.10 |
| H1958004  | H  | Medievalis | 2.MED3 | Jilin Guoqianqi,China              | 1958       |
| I1957001  | I  | Medievalis | 2.MED3 | Inner Mongolia Erlianhaote,China   | 1957       |
| H1957001  | H  | Medievalis |        | Inner Mongolia Xisuniteyouqi,China | 1957.04.11 |
| I1970012  | I  | Medievalis |        | Inner Mongolia Xianghuangqi,China  | 1970.09.05 |
| I1970013  | I  | Medievalis |        | Inner Mongolia Xianghuangqi,China  | 1970.09.08 |
| I1972001  | I  | Medievalis |        | Hebei Kangbao,China                | 1972.01.10 |
| I1994002  | I  | Medievalis |        | Hebei Kangbao,China                | 1994.11.01 |
| I1994003  | I  | Medievalis |        | Hebei Kangbao,China                | 1994.11.01 |
| I1994006  | I  | Medievalis |        | Hebei Kangbao,China                | 1994.11.25 |
| I1995004  | I  | Medievalis |        | Hebei Kangbao,China                | 1995.05.06 |
| I2001002  | I  | Medievalis |        | Shanxi Dingbian,China              | 2001.04.25 |
| I2001003  | I  | Medievalis |        | Shanxi Dingbian,China              | 2001.04.29 |
| I1994004  | I  | Medievalis |        | Hebei Kangbao,China                | 1994.11.02 |
| I1978002  | I  | Medievalis |        | Inner Mongolia Siwangziqi,China    | 1978.07.21 |
| I1978004  | I  | Medievalis |        | Inner Mongolia Siwangziqi,China    | 1978.10.11 |
| H1971002  | H  | Medievalis |        | Inner Mongolia Huade,China         | 1971       |
| I1971001  | I  | Medievalis |        | Inner Mongolia Shangdu,China       | 1971       |
| 43028     | B2 | Medievalis |        | Xingjiang Hutubi,China             |            |
| A1973001  | A  | Medievalis | 2.MED2 | Xinjiang Wuqia,China               | 1973       |
| A0041005  | A  | Medievalis |        | Xinjiang Wuqia,China               | 1973.08.19 |
| K10000002 | K1 | Medievalis |        | Xinjiang Luopu,China               |            |
| K11972003 | K1 | Medievalis | 2.MED2 | Xinjiang Luopu,China               | 1972       |
| 7338      | K1 | Medievalis | 2.MED2 | Xinjiang Hetian,China              | 1973       |
| K21987001 | K2 | Medievalis |        | Xinjiang Qiemo,China               | 1987       |
| K21987002 | K2 | Medievalis |        | Xinjiang Qiemo,China               | 1987       |
| 43027     | B2 | Medievalis |        | Xingjiang Hutubi,China             |            |
| K11973001 | K1 | Medievalis | 2.MED2 | Xinjiang Hetian,China              | 1973       |
| K11973004 | K1 | Medievalis |        | Xinjiang Hetian,China              | 1973.08.09 |
| K11973002 | K1 | Medievalis | 2.MED2 | China                              | 1973       |
| K11972001 | K1 | Medievalis |        | Xinjiang Luopu,China               | 1972.07.23 |
| K11972002 | K1 | Medievalis |        | Xinjiang Luopu,China               | 1972.09.10 |
| K11973005 | K1 | Medievalis |        | Xinjiang Hetian,China              | 1973.08.09 |
| K11973006 | K1 | Medievalis |        | Xinjiang Hetian,China              | 1973.08.12 |
| K11979001 | K1 | Medievalis |        | Xinjiang Hetian,China              | 1979       |
| K10000001 | K1 | Medievalis |        | Xinjiang Luopu,China               |            |
| 2602      | O  | Medievalis |        | Xingjiang Mosuowan,China           | 2006.05.03 |
| 2604      | O  | Medievalis |        | Xingjiang Mosuowan,China           | 2006.05.06 |
| O2005018  | O  | Medievalis |        | Xingjiang Hutubi,China             | 2000       |
| 2601      | O  | Medievalis |        | Xingjiang Mosuowan,China           | 2006.05.02 |
| 2603      | O  | Medievalis |        | Xingjiang Mosuowan,China           | 2006.05.05 |
| 2649      | O  | Medievalis |        | Xinjiang Qitai,China               | 2006.10.9  |
| 2653      | O  | Medievalis |        | Xinjiang Jimusaer,China            | 2006.10.10 |
| 2654      | O  | Medievalis |        | Xingjiang Mosuowan,China           | 2006.10.11 |
| O2005001  | O  | Medievalis |        | Xinjiang Hutubi,China              | 2005.5.20  |
| O2005002  | O  | Medievalis |        | Xinjiang Hutubi,China              | 2005.6.4   |
| O2005003  | O  | Medievalis |        | Xinjiang Hutubi,China              | 2005.6.6   |
| O2005004  | O  | Medievalis |        | Xingjiang Mosuowan,China           | 2005.5.18  |
| O2005005  | O  | Medievalis |        | Xingjiang Mosuowan,China           | 2005.5.18  |
| 2506      | O  | Medievalis | 2.MED1 | Xinjiang Mosuowan,China            | 2005.6.5   |
| O2005007  | O  | Medievalis |        | Xinjiang Mosuowan,China            | 2005.6.5   |
| O2005008  | O  | Medievalis |        | Xinjiang Mosuowan,China            | 2005.6.5   |

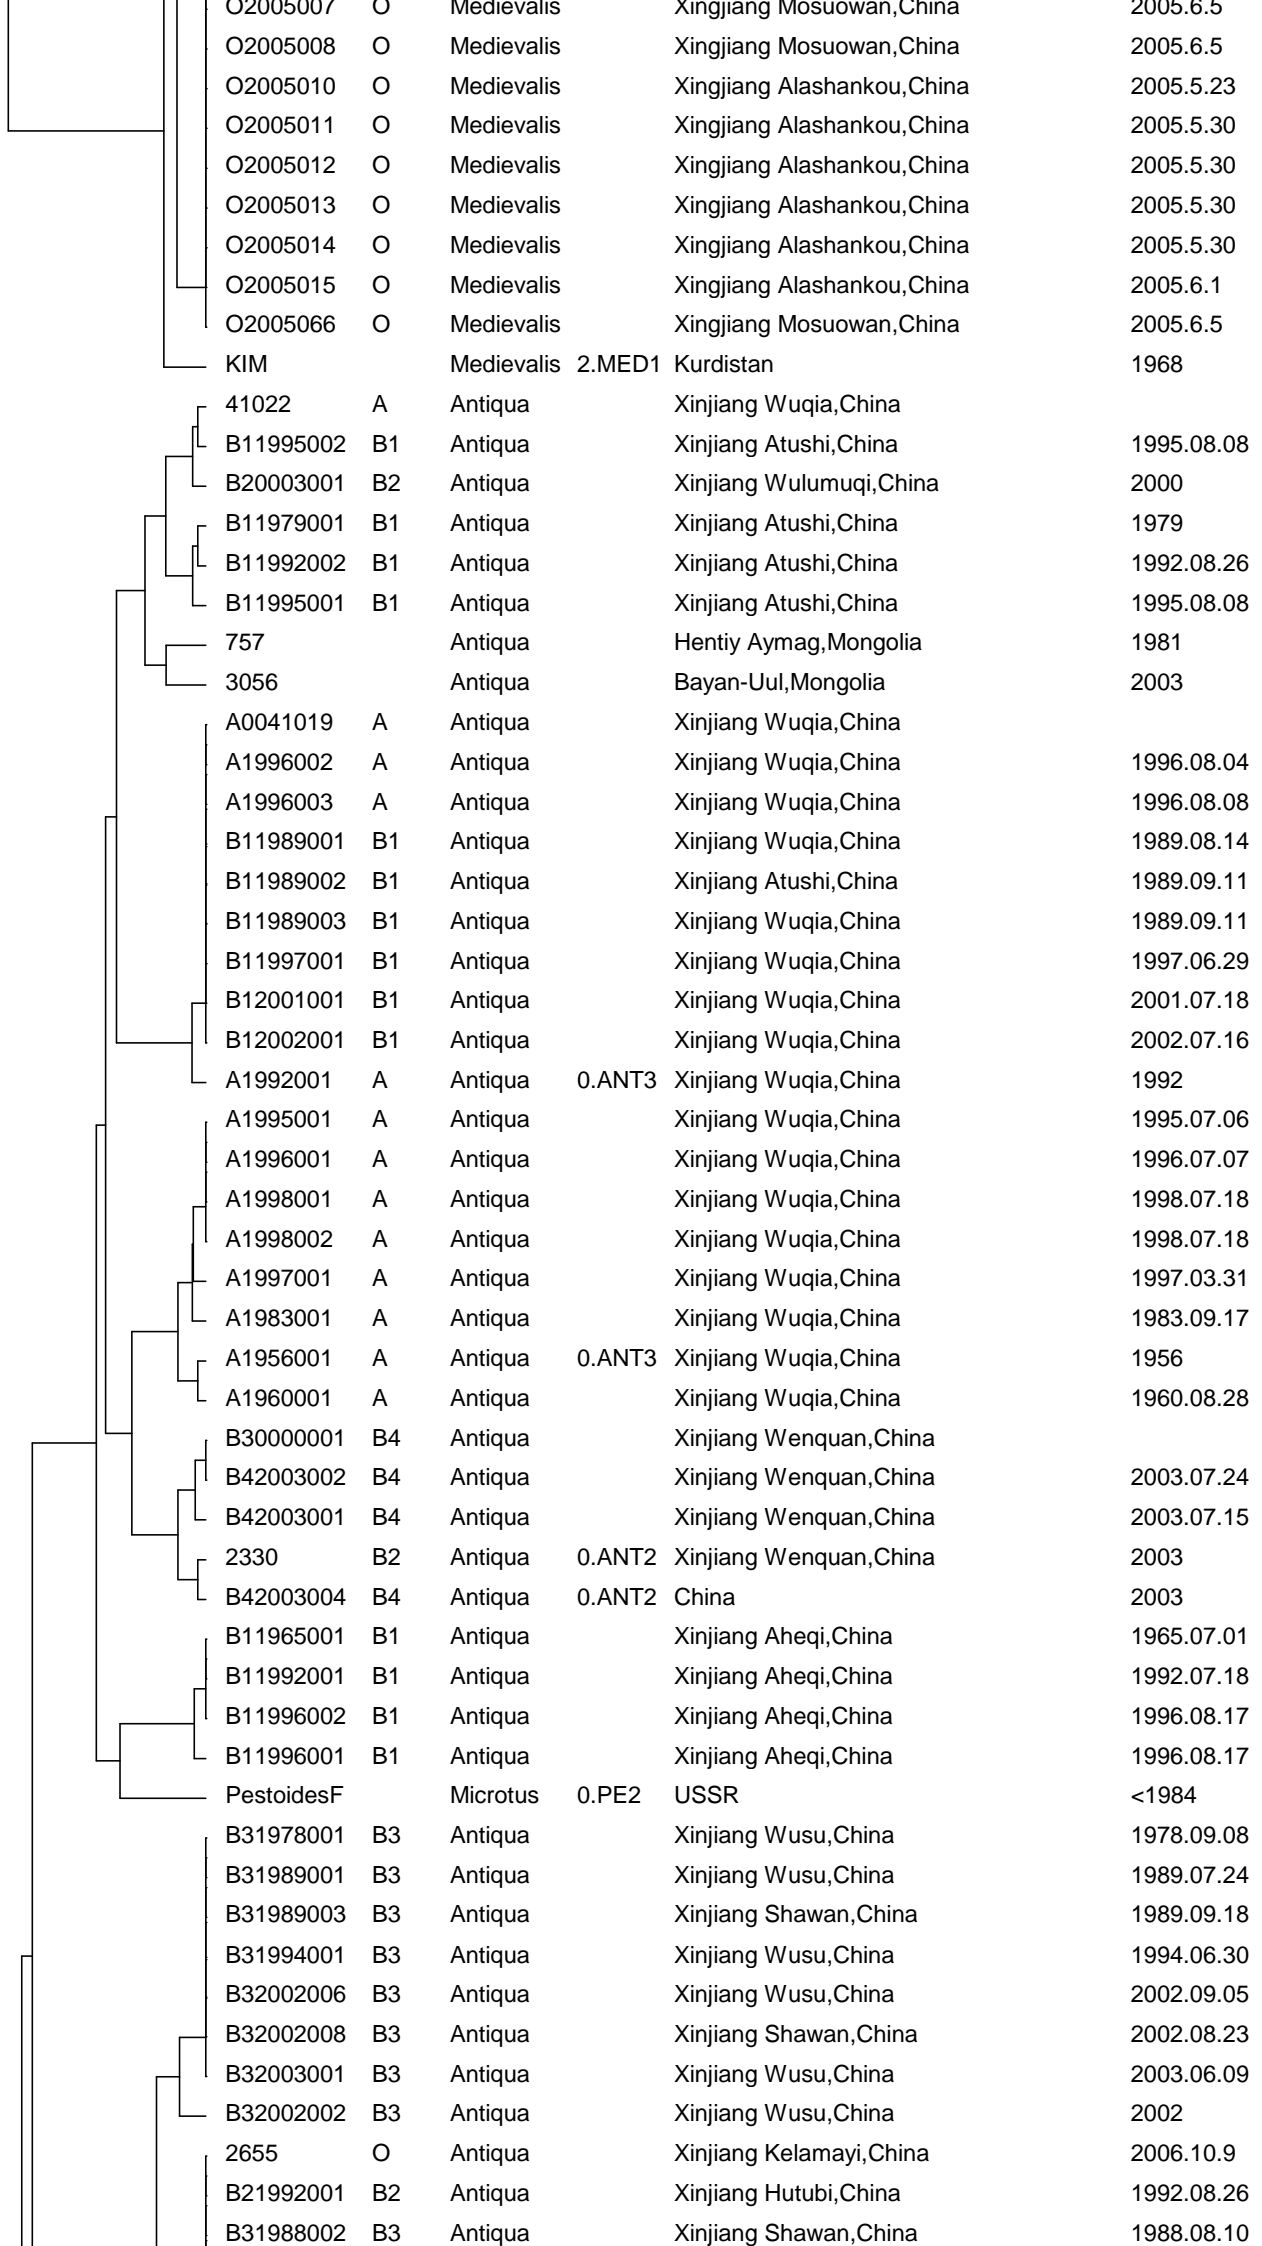

|            |          |         |        |                           |            |
|------------|----------|---------|--------|---------------------------|------------|
| B21992001  | B2       | Antiqua |        | Xinjiang Hutubi,China     | 1992.08.26 |
| B31988002  | B3       | Antiqua |        | Xinjiang Shawan,China     | 1988.08.10 |
| B31988003  | B3       | Antiqua |        | Xinjiang Shawan,China     | 1988.08.12 |
| B31989004  | B3       | Antiqua |        | Xinjiang Shawan,China     | 1993.09.01 |
| 945        | B3       | Antiqua | 0.ANT1 | Xinjiang Shawan,China     | 1994       |
| B32002001  | B3       | Antiqua |        | Xinjiang Wusu,China       | 2002.07.02 |
| B32002003  | B3       | Antiqua |        | Xinjiang Shawan,China     | 2002.08.08 |
| B32002004  | B3       | Antiqua |        | Xinjiang Shawan,China     | 2002.08.08 |
| B22002005  | B2       | Antiqua |        | Xinjiang Manasi,China     | 2002.09.05 |
| B32001006  | B3       | Antiqua |        | Xinjiang Shawan,China     | 2001.08.17 |
| B32002005  | B3       | Antiqua |        | Xinjiang Shawan,China     | 2002.08.08 |
| B32001005  | B3       | Antiqua |        | Xinjiang Shawan,China     | 2001.08.17 |
| B31988004  | B3       | Antiqua |        | Xinjiang Shawan,China     | 1988       |
| B31989005  | B3       | Antiqua |        | Xinjiang Shawan,China     | 1989       |
| B32002016  | B3       | Antiqua |        | Xinjiang Shawan,China     | 2002.08.08 |
| B22002006  | B2       | Antiqua |        | Xinjiang Manasi,China     | 2002.09.05 |
| B32001007  | B3       | Antiqua |        | Xinjiang Shawan,China     | 2001.08.17 |
| C1961001   | C        | Antiqua |        | Qinghai Xinghai,China     | 1961.05.11 |
| 620024     | C        | Antiqua | 0.PE7  | Qinghai Xinghai,China     | 1962       |
| PestoidesA | Microtus |         | 0.PE4  | FSU                       | NA         |
| Antiqua    | Aantiqua |         | 1.ANT1 | Congo                     | 1965       |
| UG05-0454  | Aantiqua |         | 1.ANT1 | Uganda                    | 2004       |
| 342        | Antiqua  |         |        | South-Gobi Aymag,Mongolia | 1977       |
| 629        | Antiqua  |         |        | Hovd Aymag,Mongolia       | 1980       |
| 2873       | Antiqua  |         |        | Bayan-Uul,Mongolia        | 2000       |
| 1387       | Microtus |         |        | South-Gobi Aymag,Mongolia | 1986       |
| 956        | Antiqua  |         |        | Hentiy Aymag,Mongolia     | 1981       |
| 988        | Antiqua  |         |        | Hentiy Aymag,Mongolia     | 1983       |
| 621        | Antiqua  |         |        | Govi-Altay Aymag,Mongolia | 1980       |
| 2641       | Antiqua  |         |        | East Goby Aymag,Mongolia  | 1997       |
| 3086       | Antiqua  |         |        | Govi-Altay Aymag,Mongolia | 2003       |
| 2669       | Antiqua  |         |        | Govi-Altay Aymag,Mongolia | 1998       |
| 2642       | Antiqua  |         |        | East Goby Aymag,Mongolia  | 1997       |
| C1972001   | C        | Antiqua | 3.ANT1 | Qinghai Lenghu,China      | 1972       |
| C1972002   | C        | Antiqua |        | Qinghai Lenghu,China      | 1972       |
| C1961006   | C        | Antiqua |        | Gansu Akesai,China        | 1961.07.20 |
| C1976001   | C        | Antiqua |        | Gansu Akesai,China        | 1976.06.12 |
| C1989002   | C        | Antiqua |        | Gansu Akesai,China        | 1989.08.14 |
| C1972003   | C        | Antiqua |        | Qinghai Lenghu,China      | 1972.06.22 |
| Angola     | Microtus |         | 0.PE3  | Angola                    | <1984      |
| B2040040   | B2       | Antiqua |        | Xinjiang Manasi,China     |            |
| B21972003  | B2       | Antiqua |        | Xinjiang Manasi,China     | 1972.08.02 |
| B21984001  | B2       | Antiqua |        | Xinjiang Changji,China    | 1984.08.08 |
| B21997001  | B2       | Antiqua |        | Xinjiang Manasi,China     | 1997.07.26 |
| B31967002  | B3       | Antiqua |        | Xinjiang Wusu,China       | 1967.08.08 |
| B31972001  | B3       | Antiqua |        | Xinjiang Jinghe,China     | 1972.07.06 |
| B41999002  | B4       | Antiqua |        | Xinjiang Yining,China     | 1999.07.12 |
| K21985001  | K2       | Antiqua |        | Xinjiang Ruoqiang,China   | 1985.07.06 |
| B21959002  | B2       | Antiqua |        | Xinjiang Hutubi,China     | 1959.09.12 |
| B21960001  | B2       | Antiqua |        | Xinjiang Changji,China    | 1960.08.15 |
| B21980003  | B2       | Antiqua |        | Xinjiang Hutubi,China     | 1980.08.28 |
| B21983004  | B2       | Antiqua |        | Xinjiang Wulumuqi,China   | 1983.08.20 |
| B21984002  | B2       | Antiqua |        | Xinjiang Changji,China    | 1984.08.08 |
| B21989001  | B2       | Antiqua |        | Xinjiang Changji,China    | 1989.09.28 |
| B21990001  | B2       | Antiqua |        | Xinjiang Wulumuqi,China   | 1990.05.23 |
| B22000002  | B2       | Antiqua |        | Xinjiang Hutubi,China     | 2000.07.29 |
| B21999002  | B2       | Antiqua |        | Xinjiang Wusu,China       | 1999.08.06 |

|           |    |         |        |                         |            |
|-----------|----|---------|--------|-------------------------|------------|
| B21993001 | B2 | Antiqua |        | Xinjiang Wulumuqi,China | 1999.08.29 |
| B22000002 | B2 | Antiqua |        | Xinjiang Hutubi,China   | 2000.07.29 |
| B31999002 | B3 | Antiqua |        | Xinjiang Wusu,China     | 1999.08.06 |
| 43013     | B2 | Antiqua |        | Xingjiang Hutubi,China  |            |
| 44034     | B2 | Antiqua |        | Xinjiang Changji,China  |            |
| B2040060  | B2 | Antiqua |        | Xinjiang Manasi,China   |            |
| B2040061  | B2 | Antiqua |        | Xinjiang Manasi,China   |            |
| B21959001 | B2 | Antiqua | 0.ANT1 | Xinjiang Manasi,China   | 1959       |
| B21961001 | B2 | Antiqua |        | Xinjiang Manasi,China   | 1961.08.19 |
| B21972001 | B2 | Antiqua |        | Xinjiang Hutubi,China   | 1972.07.21 |
| B21979001 | B2 | Antiqua |        | Xinjiang Changji,China  | 1979.08.10 |
| B21980001 | B2 | Antiqua |        | Xinjiang Hutubi,China   | 1980.08.03 |
| B21980002 | B2 | Antiqua |        | Xinjiang Hutubi,China   | 1980.08.07 |
| B21983001 | B2 | Antiqua |        | Xinjiang Changji,China  | 1983       |
| B21983002 | B2 | Antiqua |        | Xinjiang Wulumuqi,China | 1983.07.16 |
| B21983003 | B2 | Antiqua |        | Xinjiang Wulumuqi,China | 1983.07.16 |
| B21984003 | B2 | Antiqua | 0.ANT1 | Xinjiang Changji,China  | 1984       |
| B21987001 | B2 | Antiqua |        | Xinjiang Manasi,China   | 1987.06.12 |
| B21987002 | B2 | Antiqua |        | Xinjiang Manasi,China   | 1987.06.18 |
| B21990002 | B2 | Antiqua |        | Xinjiang Wulumuqi,China | 1990.05.30 |
| CMCC8211  | B3 | Antiqua | 0.ANT1 | Xinjiang Jinghe,China   | 1982       |
| B41999001 | B4 | Antiqua |        | Xinjiang Yining,China   | 1999.07.12 |
| K21985005 | K2 | Antiqua |        | Xinjiang Ruoqiang,China | 1985       |
| B32001003 | B3 | Antiqua |        | Xinjiang Wusu,China     | 2001.08.01 |
| B21965001 | B2 | Antiqua |        | Xinjiang Manasi,China   | 1965.08.01 |
| 44036     | B2 | Antiqua |        | Xinjiang Changji,China  |            |
| B22002004 | B2 | Antiqua |        | Xinjiang Changji,China  | 2002.07.22 |
| B22002002 | B2 | Antiqua |        | Xinjiang Changji,China  | 2002.07.22 |
| B20003002 | B2 | Antiqua |        | Xinjiang Wulumuqi,China | 2000       |
| B20003003 | B2 | Antiqua |        | Xinjiang Wulumuqi,China | 2000       |
| B21999001 | B2 | Antiqua |        | Xinjiang Changji,China  | 1999.06.22 |
| B22000003 | B2 | Antiqua |        | Xinjiang Changji,China  | 2000.09.23 |
| B22002001 | B2 | Antiqua |        | Xinjiang Changji,China  | 2002.07.10 |
| B22002003 | B2 | Antiqua |        | Xinjiang Changji,China  | 2002.07.22 |
| B22002007 | B2 | Antiqua |        | Xinjiang Wulumuqi,China | 2002.09.12 |
| B22003003 | B2 | Antiqua |        | Xinjiang Wulumuqi,China | 2003.09.08 |
| B22003004 | B2 | Antiqua |        | Xinjiang Changji,China  | 2003.09.15 |
| B22003005 | B2 | Antiqua |        | Xinjiang Wulumuqi,China | 2003.09.18 |
| B41975002 | B4 | Antiqua |        | Xinjiang Nileke,China   | 1975.08.20 |
| B41975003 | B4 | Antiqua |        | Xinjiang Yining,China   | 1975       |
| B41976001 | B4 | Antiqua | 0.ANT1 | Xinjiang Nileke,China   | 1976       |
| B41976003 | B4 | Antiqua | 0.ANT1 | Xinjiang Nileke,China   | 1976       |
| B41989002 | B4 | Antiqua |        | Xinjiang Nileke,China   | 1989.09.13 |
| B32001004 | B3 | Antiqua |        | Xinjiang Wusu,China     | 2001.08.01 |
| B21970001 | B2 | Antiqua |        | Xinjiang Manasi,China   | 1970.08.09 |
| B41975001 | B4 | Antiqua |        | Xinjiang Nileke,China   | 1975.07.29 |
| B41976002 | B4 | Antiqua |        | Xinjiang Nileke,China   | 1976.07.24 |
| B41983001 | B4 | Antiqua |        | Xinjiang Nileke,China   | 1983.07.26 |
| B41989001 | B4 | Antiqua |        | Xinjiang Nileke,China   | 1989.09.13 |
| C2004010  | C  | Antiqua |        | Qinghai Qumalai,China   | 2004       |
| D2004001  | D  | Antiqua |        | Qinghai Qilian,China    | 2004       |
| M2004001  | M  | Antiqua |        | Qinghai Chengduo,China  | 2004       |
| B32003002 | B3 | Antiqua |        | Xinjiang Wusu,China     | 2003.06.28 |
| B42003003 | B3 | Antiqua |        | Xinjiang Wusu,China     | 2003.08.07 |
| B32002015 | B3 | Antiqua |        | Xinjiang Wusu,China     | 2002       |
| B31964001 | B3 | Antiqua |        | Xinjiang Jinghe,China   | 1964.07.28 |
| B31970001 | B3 | Antiqua |        | Xinjiang Jinghe,China   | 1970.08.02 |



|           |    |          |        |                         |            |
|-----------|----|----------|--------|-------------------------|------------|
| B31964001 | B3 | Antiqua  |        | Xinjiang Jinghe,China   | 1964.07.28 |
| B31970001 | B3 | Antiqua  |        | Xinjiang Jinghe,China   | 1970.08.02 |
| B30000005 | B3 | Antiqua  |        | Xinjiang Wusu,China     |            |
| B30000006 | B3 | Antiqua  |        | Xinjiang Wusu,China     |            |
| B2005017  | B2 | Antiqua  |        | Xinjiang Wusu,China     | 2005       |
| B21955001 | B2 | Antiqua  |        | Xinjiang Manasi,China   | 1955.07.21 |
| B21967001 | B2 | Antiqua  |        | Xinjiang Hutubi,China   | 1967.08.21 |
| B30000013 | B3 | Antiqua  |        | Xinjiang Wusu,China     |            |
| B31964002 | B3 | Antiqua  |        | Xinjiang Wusu,China     | 1964.08.29 |
| B31966001 | B3 | Antiqua  |        | Xinjiang Jinghe,China   | 1966       |
| B31971001 | B3 | Antiqua  |        | Xinjiang Wusu,China     | 1971.07.31 |
| B31984001 | B3 | Antiqua  |        | Xinjiang Wusu,China     | 1984       |
| B31989002 | B3 | Antiqua  |        | Xinjiang Wusu,China     | 1989.07.28 |
| B31994002 | B3 | Antiqua  |        | Xinjiang Wusu,China     | 1994.07.19 |
| B31997001 | B3 | Antiqua  |        | Xinjiang Jinghe,China   | 1997.06.29 |
| B31999001 | B3 | Antiqua  |        | Xinjiang Jinghe,China   | 1999.07.12 |
| B31986001 | B3 | Antiqua  |        | Xinjiang Jinghe,China   | 1986.06.15 |
| B31980001 | B3 | Antiqua  |        | Xinjiang Jinghe,China   | 1980.07.12 |
| B32001002 | B3 | Antiqua  |        | Xinjiang Wusu,China     | 2001.07.22 |
| 2547      | B4 | Antiqua  |        | Xingjiang Nileke,China  | 2005.7.26  |
| 2548      | B4 | Antiqua  |        | Xingjiang Nileke,China  | 2005.9.20  |
| 2652      | O  | Antiqua  |        | Xinjiang Kelamayi,China | 2006.10.10 |
| 42084     | B3 | Antiqua  |        | Xinjiang Wusu,China     |            |
| B31968001 | B3 | Antiqua  |        | Xinjiang Jinghe,China   | 1968.07.26 |
| B31983001 | B3 | Antiqua  |        | Xinjiang Wusu,China     | 1983.05.23 |
| B31983002 | B3 | Antiqua  | 0.ANT1 | Xinjiang Wusu,China     | 1983       |
| B32001001 | B3 | Antiqua  |        | Xinjiang Wusu,China     | 2001.07.07 |
| K10000003 | K1 | Antiqua  |        | Xinjiang Hetian,China   |            |
| K21987003 | K2 | Antiqua  | 0.ANT1 | Xinjiang Qiemo,China    | 1987       |
| 42026     | B3 | Antiqua  |        | Xinjiang Wusu,China     |            |
| 45113     | B3 | Antiqua  |        | Xinjiang Jinghe,China   |            |
| 45115     | B3 | Antiqua  |        | Xinjiang Jinghe,China   |            |
| 45114     | B3 | Antiqua  |        | Xinjiang Jinghe,China   |            |
| B21972002 | B2 | Antiqua  | 0.ANT1 | Xinjiang Hutubi,China   | 1972       |
| B30000002 | B3 | Antiqua  |        | Xinjiang Wusu,China     |            |
| B30000004 | B3 | Antiqua  |        | Xinjiang Wusu,China     |            |
| B30000010 | B3 | Antiqua  |        | Xinjiang Wusu,China     |            |
| B30000011 | B3 | Antiqua  |        | Xinjiang Wusu,China     |            |
| B30000012 | B3 | Antiqua  |        | Xinjiang Wusu,China     |            |
| B31969001 | B3 | Antiqua  |        | Xinjiang Jinghe,China   | 1969.08.01 |
| B31981001 | B3 | Antiqua  | 0.ANT1 | Xinjiang Jinghe,China   | 1981       |
| B31982002 | B3 | Antiqua  |        | Xinjiang Jinghe,China   | 1982.10.03 |
| B32002007 | B3 | Antiqua  |        | Xinjiang Wusu,China     | 2002.08.19 |
| B32002014 | B3 | Antiqua  |        | Xinjiang Wusu,China     | 2002.08.25 |
| B32005017 | B3 | Antiqua  |        | Xinjiang Wusu,China     | 2005       |
| A1966001  | A  | Antiqua  | 0.ANT1 | Xinjiang Wuqia,China    | 1966       |
| B31967001 | B3 | Antiqua  |        | Xinjiang Wusu,China     | 1967.08.01 |
| B31984002 | B3 | Antiqua  |        | Xinjiang Wusu,China     | 1984.08.21 |
| B31987001 | B3 | Antiqua  |        | Xinjiang Wusu,China     | 1987.07.21 |
| B30000003 | B3 | Antiqua  |        | Xinjiang Wusu,China     |            |
| B31965001 | B3 | Antiqua  | 0.ANT1 | Xinjiang Jinghe,China   | 1965       |
| B41976004 | B4 | Antiqua  |        | Xinjiang Nileke,China   | 1976.08.07 |
| B30000007 | B3 | Antiqua  |        | Xinjiang Wusu,China     |            |
| B30000008 | B3 | Antiqua  |        | Xinjiang Wusu,China     |            |
| B30000009 | B3 | Antiqua  |        | Xinjiang Wusu,China     |            |
| B22001001 | B2 | Antiqua  |        | Xinjiang Changji,China  | 2001.08.29 |
| M0000002  | M  | Microtus | 0.PE4  | Qinghai Chengduo,China  | 2001       |

|           |    |          |       |                                   |            |
|-----------|----|----------|-------|-----------------------------------|------------|
| B22001001 | B2 | Antiqua  |       | Xinjiang Changji,China            | 2001.08.29 |
| M0000002  | M  | Microtus | 0.PE4 | Qinghai Chengduo,China            | 2001       |
| M2001009  | M  | Microtus | 0.PE4 | Qinghai Chengduo,China            | 2001       |
| M1997001  | M  | Microtus | 0.PE4 | Sichuan Shiqu,China               | 1997       |
| M0000001  | M  | Antiqua  |       | Qinghai Chengduo,China            |            |
| M0000003  | M  | Antiqua  |       | Qinghai Chengduo,China            |            |
| M0000004  | M  | Antiqua  |       | Qinghai Chengduo,China            |            |
| M0000005  | M  | Microtus |       | Qinghai Chengduo,China            |            |
| M0000006  | M  | Microtus |       | Qinghai Chengduo,China            |            |
| M0000007  | M  | Microtus |       | Qinghai Chengduo,China            |            |
| M0000008  | M  | Microtus |       | Qinghai Chengduo,China            |            |
| M0000009  | M  | Microtus |       | Qinghai Chengduo,China            |            |
| M0000010  | M  | Microtus |       | Qinghai Chengduo,China            |            |
| M1997005  | M  | Microtus |       | Sichuan Shiqu,China               | 1997.07.14 |
| M2000003  | M  | Microtus |       | Qinghai Chengduo,China            | 2000.06.21 |
| M2000005  | M  | Microtus |       | Sichuan Shiqu,China               | 2000.06.29 |
| M2000006  | M  | Microtus |       | Sichuan Shiqu,China               | 2000.06.29 |
| M2001001  | M  | Microtus |       | Qinghai Chengduo,China            | 2001.06.21 |
| M2001002  | M  | Microtus |       | Qinghai Chengduo,China            | 2001.06.27 |
| M2001003  | M  | Microtus |       | Qinghai Chengduo,China            | 2001.06.30 |
| M2001004  | M  | Microtus |       | Qinghai Chengduo,China            | 2001.07.11 |
| M2001005  | M  | Microtus |       | Qinghai Chengduo,China            | 2001.07.15 |
| M2001006  | M  | Microtus |       | Qinghai Chengduo,China            | 2001.07.15 |
| M2001008  | M  | Microtus |       | Qinghai Chengduo,China            | 2001.07.15 |
| M2001010  | M  | Microtus |       | Qinghai Chengduo,China            | 2001.07.15 |
| M1997002  | M  | Microtus |       | Sichuan Shiqu,China               | 1997.07.11 |
| M1997003  | M  | Microtus |       | Sichuan Shiqu,China               | 1997.07.11 |
| M1997004  | M  | Microtus |       | Sichuan Shiqu,China               | 1997.07.13 |
| M1997006  | M  | Microtus |       | Sichuan Shiqu,China               | 1997.07.16 |
| M1997009  | M  | Microtus |       | Sichuan Shiqu,China               | 1997.07.07 |
| M1997012  | M  | Microtus |       | Sichuan Shiqu,China               | 1997.07.09 |
| M2000001  | M  | Microtus |       | Sichuan Shiqu,China               | 2000.06.18 |
| M2000002  | M  | Microtus |       | Sichuan Shiqu,China               | 2000.06.20 |
| M2000004  | M  | Microtus |       | Sichuan Shiqu,China               | 2000.06.22 |
| M2001011  | M  | Microtus |       | Sichuan Shiqu,China               | 2001.08.10 |
| M2001012  | M  | Microtus |       | Sichuan Shiqu,China               | 2001.08.17 |
| M2001013  | M  | Microtus |       | Sichuan Shiqu,China               | 2001.08.24 |
| M2002001  | M  | Microtus |       | Sichuan Shiqu,China               | 2002.07.18 |
| M2002002  | M  | Microtus |       | Sichuan Shiqu,China               | 2002.08.20 |
| M2000008  | M  | Microtus |       | Sichuan Shiqu,China               | 2000.07.31 |
| M1997007  | M  | Microtus |       | Sichuan Shiqu,China               | 1997.07.27 |
| M2000007  | M  | Microtus |       | Sichuan Shiqu,China               | 2000.07.19 |
| M1997008  | M  | Microtus |       | Sichuan Shiqu,China               | 1997.07.06 |
| M1997011  | M  | Microtus |       | Sichuan Shiqu,China               | 1997.07.09 |
| M1997010  | M  | Microtus |       | Sichuan Shiqu,China               | 1997.07.09 |
| M2001007  | M  | Microtus |       | Qinghai Chengduo,China            | 2001.07.15 |
| 3136      |    | Microtus |       | inner Mongolia Erlianhaotei,China | 2007       |
| 3137      |    | Microtus |       | Inner Mongolia Erlianhaotei,China | 2007       |
| L1970001  | L  | Microtus |       | Inner Mongolia abagaqi,China      | 1970.04.21 |
| L1970002  | L  | Microtus |       | Inner Mongolia sunitezuoqi,China  | 1970.05.16 |
| L1970005  | L  | Microtus |       | Inner Mongolia abahanaerqi,China  | 1970.06.03 |
| L1970006  | L  | Microtus |       | Inner Mongolia abahanaerqi,China  | 1970.06.07 |
| L1970007  | L  | Microtus |       | Inner Mongolia abahanaerqi,China  | 1970.06.08 |
| L1970008  | L  | Microtus |       | Inner Mongolia abahanaerqi,China  | 1970.06.16 |
| L1970009  | L  | Microtus |       | Inner Mongolia abagaqi,China      | 1970.06.21 |
| L1970011  | L  | Microtus |       | Inner Mongolia abagaqi,China      | 1970.06.23 |
| L1970010  | L  | Microtus |       | Inner Mongolia abagaqi,China      | 1970.06.25 |

|          |   |          |       |                                       |            |
|----------|---|----------|-------|---------------------------------------|------------|
| L1970009 | L | Microtus |       | Inner Mongolia abagaqi,China          | 1970.06.21 |
| L1970011 | L | Microtus |       | Inner Mongolia abagaqi,China          | 1970.06.23 |
| L1970012 | L | Microtus |       | Inner Mongolia sunitezuoqi,China      | 1970.06.25 |
| L1970013 | L | Microtus |       | Inner Mongolia sunitezuoqi,China      | 1970.06.28 |
| L1970014 | L | Microtus |       | Inner Mongolia abagaqi,China          | 1970.06.28 |
| L1970015 | L | Microtus |       | Inner Mongolia abahanaerqi,China      | 1970.07.10 |
| L1970017 | L | Microtus |       | Inner Mongolia abahanaerqi,China      | 1970.07.15 |
| L1976001 | L | Microtus |       | Inner Mongolia Xiwuzhumuqinqi,China   | 1976.05.24 |
| L1976002 | L | Microtus |       | Inner Mongolia Xiwuzhumuqinqi,China   | 1976.06.19 |
| L1987001 | L | Microtus |       | Inner Mongolia sunitezuoqi,China      | 1987.12.05 |
| L1989001 | L | Microtus |       | Inner Mongolia Dongwuzhumuqinqi,China | 1989.05.19 |
| L1989002 | L | Microtus |       | Inner Mongolia Dongwuzhumuqinqi,China | 1989.05.25 |
| 91001    |   | Microtus | 0.PE4 | China                                 | 1970       |
| L1970004 | L | Microtus |       | Inner Mongolia Dongwuzhumuqinqi,China | 1970.05.16 |
| C1988002 | C | Antiqua  |       | Qinghai Xinghai,China                 | 1988.03.10 |
| C2004005 | C | Antiqua  |       | Qinghai Wulan,China                   | 2004       |
| D1990001 | D | Antiqua  |       | Qinghai Qilian,China                  | 1990.06.08 |
| C2000001 | C | Antiqua  | 1.IN2 | Qinghai Delingha,China                | 2000       |
| C1988001 | C | Antiqua  |       | Qinghai Xinghai,China                 | 1988.03.08 |
| C1993002 | C | Antiqua  |       | Gansu Yumen,China                     | 1993       |
| D0000002 | D | Antiqua  |       | Qinghai Qilian,China                  |            |
| D0000003 | D | Antiqua  |       | Qinghai Qilian,China                  |            |
| C1970005 | C | Antiqua  | 1.IN2 | Qinghai Gonghe,China                  | 1970       |
| C1977001 | C | Antiqua  |       | Gansu Yumen,China                     | 1977.09.30 |
| C1979002 | C | Antiqua  | 1.IN2 | Qinghai Mangya,China                  | 1979       |
| C1983006 | C | Antiqua  |       | Qinghai Haiyan,China                  | 1983.08.26 |
| C1985001 | C | Antiqua  |       | Qinghai Gonghe,China                  | 1985.07.06 |
| C1996001 | C | Antiqua  |       | Qinghai Delingha,China                | 1996.07.24 |
| C2000002 | C | Antiqua  |       | Qinghai Tianjun,China                 | 2000.09.11 |
| C2002001 | C | Antiqua  |       | Qinghai Delingha,China                | 2002.08.22 |
| C2003002 | C | Antiqua  |       | Qinghai Wulan,China                   | 2003.08.16 |
| D1963001 | D | Antiqua  |       | Qinghai Qilian,China                  | 1963.06.02 |
| D2001003 | D | Antiqua  |       | Qinghai Tongde,China                  | 2001.06.04 |
| C1961007 | C | Antiqua  |       | Qinghai Xinghai,China                 | 1961.6.11  |
| F1952001 | F | Antiqua  | 1.IN2 | Yunnan Midu,China                     | 1952       |
| C1978001 | C | Antiqua  |       | Qinghai Maduo,China                   | 1978.07.24 |
| C0000002 | C | Antiqua  |       | Qinghai Gonghe,China                  |            |
| C1960002 | C | Antiqua  |       | Qinghai Haiyan,China                  | 1960.06.25 |
| C1961002 | C | Antiqua  |       | Qinghai Gonghe,China                  | 1961.06.02 |
| C1961003 | C | Antiqua  |       | Qinghai Gonghe,China                  | 1961.06.15 |
| C1961004 | C | Antiqua  |       | Gansu Sunan,China                     | 1961.06.28 |
| C1964002 | C | Antiqua  |       | Qinghai Dulan,China                   | 1964.08.11 |
| C1964003 | C | Antiqua  |       | Qinghai Haiyan,China                  | 1964.08.15 |
| C1966001 | C | Antiqua  |       | Qinghai Haiyan,China                  | 1966.08.12 |
| C1966002 | C | Antiqua  |       | Qinghai Tianjun,China                 | 1966.09.01 |
| C1967002 | C | Antiqua  |       | Qinghai Gonghe,China                  | 1967.06.19 |
| C1968001 | C | Antiqua  |       | Qinghai Gangcha,China                 | 1968.05.30 |
| C1969002 | C | Antiqua  |       | Qinghai Wulan,China                   | 1969.08.25 |
| C1970002 | C | Antiqua  |       | Qinghai Xinghai,China                 | 1970.06.17 |
| C1970006 | C | Antiqua  |       | Qinghai Gonghe,China                  | 1970.07.29 |
| C1970007 | C | Antiqua  |       | Qinghai Guide,China                   | 1970.08.09 |
| C1970008 | C | Antiqua  |       | Qinghai Dulan,China                   | 1970.09.15 |
| C1971004 | C | Antiqua  |       | Gansu Subei,China                     | 1971.08.05 |
| C1972004 | C | Antiqua  |       | Gansu Yumen,China                     | 1972.07.26 |
| C1973001 | C | Antiqua  |       | Qinghai Gangcha,China                 | 1973.08.17 |
| C1974001 | C | Antiqua  |       | Qinghai Gangcha,China                 | 1974.07.13 |
| C1974002 | C | Antiqua  |       | Qinghai Tianjun,China                 | 1974.08.01 |

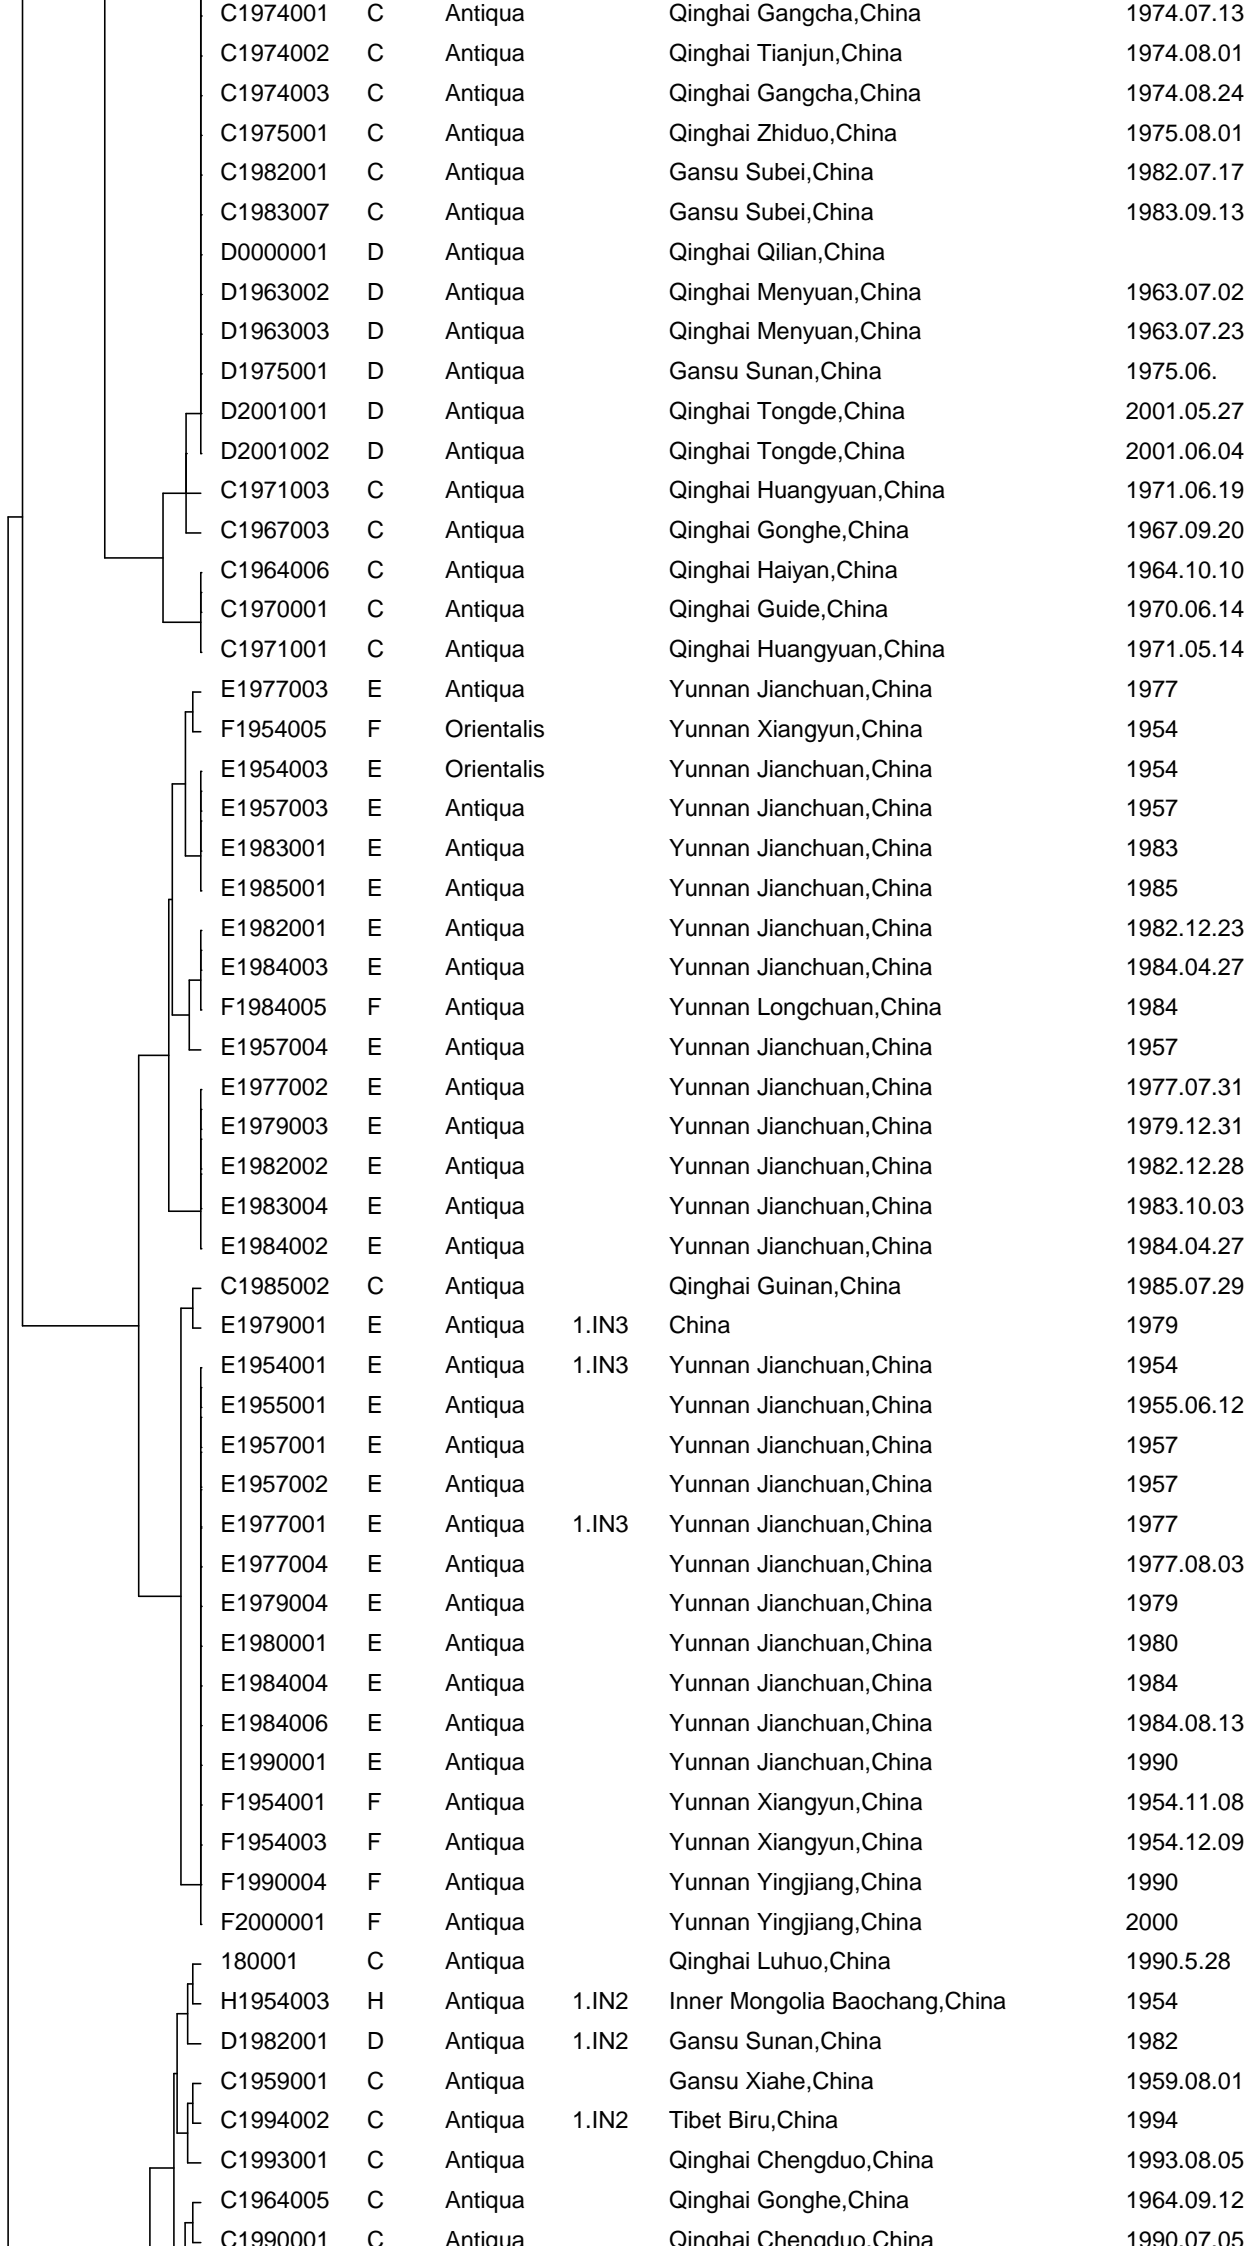

|          |   |         |       |                        |            |
|----------|---|---------|-------|------------------------|------------|
| C1964005 | C | Antiqua |       | Qinghai Gonghe,China   | 1964.09.12 |
| C1990001 | C | Antiqua |       | Qinghai Chengduo,China | 1990.07.05 |
| C1962003 | C | Antiqua | 1.IN2 | Qinghai Xinghai,China  | 1962       |
| D1991005 | D | Antiqua | 1.IN2 | Qinghai Zeku,China     | 1991       |
| C1954001 | C | Antiqua | 1.IN2 | Qinghai Guinan,China   | 1954       |
| C1960001 | C | Antiqua | 1.IN2 | Qinghai Tongren,China  | 1960       |
| C1969001 | C | Antiqua |       | Qinghai Zhaduo,China   | 1969.07.23 |
| C1973002 | C | Antiqua |       | Qinghai Nangqian,China | 1973.09.09 |
| C1974004 | C | Antiqua |       | Qinghai Zhaduo,China   | 1974.09.06 |
| C1974005 | C | Antiqua |       | Qinghai Zhaduo,China   | 1974.09.23 |
| C1983008 | C | Antiqua |       | Qinghai Maduo,China    | 1983.11.06 |
| C1986001 | C | Antiqua |       | Qinghai Tongren,China  | 1986.06.24 |
| C1986002 | C | Antiqua |       | Qinghai Tongren,China  | 1986.07.26 |
| C1986003 | C | Antiqua |       | Tibe Chaya,China       | 1986.08.21 |
| C1994003 | C | Antiqua |       | Qinghai Dulan,China    | 1994.09.24 |
| C1980004 | C | Antiqua |       | Qinghai Maduo,China    | 1980.11.07 |
| C1985003 | C | Antiqua |       | Qinghai Guinan,China   | 1985.07.31 |
| D1985002 | D | Antiqua |       | Qinghai Qilian,China   | 1985.10.07 |
| C0000001 | C | Antiqua |       | Qinghai Zhunhua,China  |            |
| C1960003 | C | Antiqua |       | Gansu Xiahe,China      | 1960.09.10 |
| C1960004 | C | Antiqua |       | Gansu Xiahe,China      | 1960.10.05 |
| C1964004 | C | Antiqua |       | Gansu Sunan,China      | 1964.08.20 |
| C1970009 | C | Antiqua |       | Qinghai Zhunhua,China  | 1970.09.23 |
| C1979003 | C | Antiqua |       | Qinghai Maqin,China    | 1979.08.03 |
| C1980001 | C | Antiqua |       | Qinghai Maqin,China    | 1980.10.18 |
| C1983004 | C | Antiqua |       | Tibe Chaya,China       | 1983.08.11 |
| C1983001 | C | Antiqua |       | Tibet Changdu,China    | 1983.07.03 |
| C1983002 | C | Antiqua |       | Tibet Changdu,China    | 1983.07.04 |
| C1998001 | C | Antiqua |       | Tibet Changdu,China    | 1998.05.29 |
| C1998002 | C | Antiqua |       | Tibet Dangxiong,China  | 1998.07.28 |
| D1991002 | D | Antiqua |       | Qinghai Zeku,China     | 1991.09.05 |
| D1991003 | D | Antiqua |       | Qinghai Tongde,China   | 1991.09.05 |
| D1991006 | D | Antiqua |       | Qinghai Zeku,China     | 1991.09.10 |
| C1978009 | C | Antiqua |       | Tibet Dingqing,China   | 1978.09.07 |
| C1990002 | C | Antiqua |       | Tibe Baqing,China      | 1990.08.04 |
| C1985004 | C | Antiqua |       | Qinghai Guinan,China   | 1985.08.19 |
| C1997001 | C | Antiqua |       | Qinghai Nangqian,China | 1997.11.15 |
| D1991001 | D | Antiqua |       | Qinghai Tongde,China   | 1991.09.05 |
| D1991004 | D | Antiqua | 1.IN2 | Qinghai Zeku,China     | 1991       |
| C1975002 | C | Antiqua |       | Qinghai Yushu,China    | 1975.09.01 |
| C1975003 | C | Antiqua | 1.IN2 | Qinghai Yushu,China    | 1975       |
| C1964001 | C | Antiqua |       | Qinghai Yushu,China    | 1964.07.11 |
| C1964007 | C | Antiqua |       | Qinghai Yushu,China    | 1964.10.17 |
| C1967001 | C | Antiqua |       | Qinghai Wulan,China    | 1967       |
| D1984001 | D | Antiqua | 1.IN2 | Gansu Sunan,China      | 1984       |
| C1960005 | C | Antiqua |       | Gansu Xiahe,China      | 1960.11.05 |
| C1978011 | C | Antiqua |       | Qinghai Nangqian,China | 1978.10.27 |
| C1978003 | C | Antiqua |       | Qinghai Yushu,China    | 1978.07.28 |
| C1978010 | C | Antiqua |       | Qinghai Nangqian,China | 1978.10.27 |
| C1982002 | C | Antiqua |       | Qinghai Yushu,China    | 1982.07.28 |
| C1990004 | C | Antiqua |       | Qinghai Nangqian,China | 1990.08.16 |
| C1954003 | C | Antiqua |       | Qinghai Heinan,China   | 1954       |
| D1960001 | D | Antiqua |       | Qinghai Qilian,China   | 1960.05.26 |
| D1964001 | D | Antiqua | 1.IN2 | Qinghai Menyuan,China  | 1964       |
| D1964002 | D | Antiqua | 1.IN2 | Qinghai Menyuan,China  | 1964       |
| D1983001 | D | Antiqua |       | Qinghai Menyuan,China  | 1983.04.04 |

|           |    |         |       |                          |            |
|-----------|----|---------|-------|--------------------------|------------|
| D1964002  | D  | Antiqua | 1.IN2 | Qinghai Menyuan,China    | 1964       |
| D1983001  | D  | Antiqua |       | Qinghai Menyuan,China    | 1983.04.04 |
| D1967001  | D  | Antiqua |       | Qinghai Menyuan,China    | 1967.08.23 |
| C1954002  | C  | Antiqua |       | Qinghai Heinan,China     | 1954       |
| C1961005  | C  | Antiqua |       | Gansu Sunan,China        | 1961.07.16 |
| C1983003  | C  | Antiqua |       | Gansu Akesai,China       | 1983.07.11 |
| D0000004  | D  | Antiqua |       | Qinghai Menyuan,China    |            |
| D1958001  | D  | Antiqua |       | Qinghai Qilian,China     | 1958       |
| D1965001  | D  | Antiqua |       | Qinghai Qilian,China     | 1965.09.21 |
| D1977001  | D  | Antiqua |       | Qinghai Qilian,China     | 1977.09.21 |
| D1985001  | D  | Antiqua |       | Gansu Sunan,China        | 1985.06.08 |
| 2650      | O  | Antiqua |       | Xinjiang Kelamayi,China  | 2006.10.9  |
| 2651      | O  | Antiqua |       | Xingjiang Mosuowan,China | 2006.10.9  |
| 2656      | O  | Antiqua |       | Xinjiang Qitai,China     | 2006.10.06 |
| K22005001 | K2 | Antiqua |       | Xinjiang Ruoqiang,China  | 2005.10.9  |
| 2638      | K2 | Antiqua |       | Xinjiang Qiemo,China     | 2006.08.09 |
| 2640      | K2 | Antiqua |       | Xinjiang Qiemo,China     | 2006.08.09 |
| K21985002 | K2 | Antiqua | 1.IN1 | Xinjiang Ruoqiang,China  | 1985       |
| K21985004 | K2 | Antiqua |       | Xinjiang Ruoqiang,China  | 1985.07.25 |
| K21985006 | K2 | Antiqua | 1.IN1 | Xinjiang Ruoqiang,China  | 1985       |
| K21985007 | K2 | Antiqua |       | Xinjiang Ruoqiang,China  | 1985.08.11 |
| C1979001  | C  | Antiqua |       | Qinghai Mangya,China     | 1979.07.19 |
| K21985003 | K2 | Antiqua |       | Xinjiang Ruoqiang,China  | 1985.07.21 |
| K21985008 | K2 | Antiqua |       | Xinjiang Ruoqiang,China  | 1985.08.27 |
| C1978007  | C  | Antiqua |       | Qinghai Zhiduo,China     | 1978.08.25 |
| C1978008  | C  | Antiqua |       | Qinghai Zhiduo,China     | 1978.08.25 |
| C1976002  | C  | Antiqua | 1.IN2 | Tibet Naqu,China         | 1976       |
| C1976005  | C  | Antiqua |       | Tibet Naqu,China         | 1976.07.14 |
| C1976006  | C  | Antiqua |       | Tibet Naqu,China         | 1976.07.31 |
| C1980002  | C  | Antiqua | 1.IN2 | Qinghai Qumalai,China    | 1980       |
| C1987001  | C  | Antiqua |       | Tibe Aanduo,China        | 1987.07.21 |
| C1988003  | C  | Antiqua |       | Tibe Aanduo,China        | 1988.06.10 |
| C1988004  | C  | Antiqua |       | Tibe Nierong,China       | 1988.09.13 |
| C1989001  | C  | Antiqua | 1.IN2 | Qinghai Zhaduo,China     | 1989       |
| C1992003  | C  | Antiqua |       | Qinghai Zhiduo,China     | 1992.11.03 |
| C2003001  | C  | Antiqua |       | Qinghai Geermu,China     | 2003.06.27 |
| C1998003  | C  | Antiqua |       | Qinghai Qumalai,China    | 1998.09.15 |
| C1962001  | C  | Antiqua |       | Qinghai Huangyuan,China  | 1962.08.13 |
| C1965001  | C  | Antiqua |       | Qinghai Yushu,China      | 1965.06.03 |
| C1970003  | C  | Antiqua |       | Qinghai Qumalai,China    | 1970.06.30 |
| C1970004  | C  | Antiqua |       | Qinghai Qumalai,China    | 1970.06.30 |
| C1971002  | C  | Antiqua |       | Qinghai Guide,China      | 1971.06.04 |
| C1976003  | C  | Antiqua |       | Tibet Naqu,China         | 1976.06.24 |
| C1976004  | C  | Antiqua |       | Tibet Naqu,China         | 1976.07.12 |
| C1976007  | C  | Antiqua |       | Tibet Naqu,China         | 1976.08.07 |
| C1978002  | C  | Antiqua |       | Tibet Naqu,China         | 1978.07.27 |
| C1978004  | C  | Antiqua |       | Tibet Naqu,China         | 1978.08.04 |
| C1978005  | C  | Antiqua |       | Tibet Naqu,China         | 1978.08.04 |
| C1978006  | C  | Antiqua |       | Tibet Naqu,China         | 1978.08.18 |
| C1980003  | C  | Antiqua |       | Tibet Biru,China         | 1980.11.03 |
| C1983005  | C  | Antiqua |       | Qinghai Zhiduo,China     | 1983.08.14 |
| C1987002  | C  | Antiqua |       | Tibe Aanduo,China        | 1987.08.11 |
| C1990003  | C  | Antiqua |       | Tibe Aanduo,China        | 1990.08.04 |
| C1991001  | C  | Antiqua |       | Qinghai Geermu,China     | 1991.08.24 |
| C1992001  | C  | Antiqua |       | Tibe Nierong,China       | 1992.07.14 |
| C1992002  | C  | Antiqua |       | Tibe Aanduo,China        | 1992.08.05 |
| C1994004  | C  | Antiqua |       | Tibet Dangxiong,China    | 1994.10.23 |

|  |           |   |            |                               |            |
|--|-----------|---|------------|-------------------------------|------------|
|  | C1992002  | C | Antiqua    | Tibe Aanduo,China             | 1992.08.05 |
|  | C1994004  | C | Antiqua    | Tibet Dangxiong,China         | 1994.10.23 |
|  | F1987001  | F | Orientalis | Yunnan Wanting,China          | 1987       |
|  | F1996018  | F | Orientalis | Yunnan Jianshui,China         | 1996       |
|  | F1999009  | F | Orientalis | Yunnan Honghe,China           | 1999       |
|  | F1950001  | F | Orientalis | Fujian Huaan,China            | 1950       |
|  | F1995006  | F | Orientalis | Yunnan Jinggu,China           | 1995       |
|  | F1990011  | F | Orientalis | Yunnan Lianghe,China          | 1990       |
|  | F2001002  | F | Orientalis | Yunnan Pingbian,China         | 2001       |
|  | F1994006  | F | Orientalis | Yunnan Shidian,China          | 1994       |
|  | F1996014  | F | Orientalis | Yunnan Lianghe,China          | 1996       |
|  | F1982002  | F | Orientalis | Yunnan Longchuan,China        | 1982.07.28 |
|  | F1982003  | F | Orientalis | Yunnan Ruili,China            | 1982.08.13 |
|  | F1983006  | F | Orientalis | Yunnan Baoshan,China          | 1983.09.06 |
|  | F1990013  | F | Orientalis | Yunnan Yingjiang,China        | 1990.09.18 |
|  | F1990015  | F | Orientalis | Yunnan Lianghe,China          | 1990.11.03 |
|  | F1991002  | F | Orientalis | Yunnan Wanting,China          | 1991.06.07 |
|  | F1943002  | F | Orientalis | Fujian Fuzhou,China           | 1943       |
|  | F1991016  | F | Orientalis | 1.ORI2 China                  | 1991       |
|  | India195  |   | Orientalis | 1.ORI1 India                  | >1898      |
|  | CA88-4125 |   | Orientalis | 1.ORI1 USA                    | 1988       |
|  | YN663     | F | Orientalis | 1.ORI2 Yunnan Longchuan,China | 1982       |
|  | FV-I      |   | Orientalis | 1.ORI1 USA                    | 2001       |
|  | CO92      |   | Orientalis | 1.ORI1 USA                    | 1992       |
|  | MG05-1020 |   | Orientalis | 1.ORI3 Madagascar             | 2005       |
|  | F1991017  | F | Orientalis | Yunnan Gengma,China           | 1991       |
|  | F1997001  | F | Orientalis | Yunnan Kaiyuan,China          | 1997       |
|  | F1999004  | F | Orientalis | Yunnan Luoxi,China            | 1999       |
|  | F0000004  | F | Orientalis | Yunnan Mengzi,China           |            |
|  | F1983012  | F | Orientalis | Yunnan Ruili,China            | 1983       |
|  | F1996009  | F | Orientalis | Yunnan Mojiang,China          | 1996       |
|  | F1990010  | F | Orientalis | Yunnan Longchuan,China        | 1990.08.04 |
|  | F1992001  | F | Orientalis | Yunnan Lanchang,China         | 1992.01.22 |
|  | F1992010  | F | Orientalis | Yunnan Shuangjiang,China      | 1992       |
|  | F1996021  | F | Orientalis | Yunnan Gejiu,China            | 1996       |
|  | F1999006  | F | Orientalis | Yunnan Yunxian,China          | 1999       |
|  | F1990001  | F | Orientalis | Yunnan Ruili,China            | 1990       |
|  | F2002003  | F | Orientalis | Yunnan Yanshan,China          | 2002       |
|  | F1990022  | F | Orientalis | Yunnan Gengma,China           | 1990       |
|  | F1990023  | F | Orientalis | Yunnan Gengma,China           | 1990       |
|  | F1991005  | F | Orientalis | Yunnan Wanting,China          | 1991       |
|  | F1991006  | F | Orientalis | Yunnan Zhenkang,China         | 1991.07.08 |
|  | F1991015  | F | Orientalis | Yunnan Changyuan,China        | 1991       |
|  | F1992012  | F | Orientalis | Yunnan Changyuan,China        | 1992.11.12 |
|  | F1994003  | F | Orientalis | Yunnan Tengchong,China        | 1994       |
|  | F1994007  | F | Orientalis | Yunnan Shidian,China          | 1994       |
|  | F1995002  | F | Orientalis | Yunnan Puer,China             | 1995       |
|  | F1995005  | F | Orientalis | Yunnan Zhenkang,China         | 1995       |
|  | F1995008  | F | Orientalis | Myanmar                       | 1995       |
|  | F1995009  | F | Orientalis | Yunnan Yingjiang,China        | 1995       |
|  | F1996001  | F | Orientalis | Yunnan Mojiang,China          | 1996.04.03 |
|  | F1996007  | F | Orientalis | Yunnan Mojiang,China          | 1996.08.26 |
|  | F1996019  | F | Orientalis | Yunnan Gejiu,China            | 1996       |
|  | F1943001  | F | Orientalis | Fujian Fuzhou,China           | 1943       |
|  | F1952004  | F | Orientalis | Fujian Putian,China           | 1952       |
|  | F2002002  | F | Orientalis | Yunnan Wenshan,China          | 2002       |
|  | F1992002  | F | Orientalis | Yunnan Linchang,China         | 1992       |

|          |   |            |                               |            |
|----------|---|------------|-------------------------------|------------|
| F2002002 | F | Orientalis | Yunnan Wenshan,China          | 2002       |
| F1992002 | F | Orientalis | Yunnan Linchang,China         | 1992       |
| F1946001 | F | Orientalis | 1.ORI2 Fujian Gutian,China    | 1946       |
| F1986001 | F | Orientalis | Yunnan Yingjiang,China        | 1986       |
| E1983002 | E | Orientalis | Yunnan Jianchuan,China        | 1983       |
| E1983003 | E | Orientalis | Yunnan Jianchuan,China        | 1983       |
| F0000001 | F | Orientalis | Yunnan Yanshan,China          |            |
| F0000002 | F | Orientalis | Guangxi Longlin,China         |            |
| F1954002 | F | Orientalis | Yunnan Xiangyun,China         | 1954       |
| F1958001 | F | Orientalis | Yunnan Dali,China             | 1958       |
| F1964001 | F | Orientalis | Yunnan Lianghe,China          | 1964       |
| F1982001 | F | Orientalis | Yunnan Longchuan,China        | 1982.07.28 |
| F1982004 | F | Orientalis | Yunnan Ruili,China            | 1982.08.15 |
| F1982005 | F | Orientalis | Yunnan Ruili,China            | 1982.08.30 |
| F1982006 | F | Orientalis | Yunnan Longchuan,China        | 1982       |
| F1982007 | F | Orientalis | Yunnan Ruili,China            | 1982       |
| F1983001 | F | Orientalis | Yunnan Ruili,China            | 1983       |
| F1983002 | F | Orientalis | Yunnan Ruili,China            | 1983.08.11 |
| F1983003 | F | Orientalis | Yunnan Baoshan,China          | 1983.08.24 |
| F1983004 | F | Orientalis | Yunnan Ruili,China            | 1983       |
| F1983005 | F | Orientalis | Yunnan Baoshan,China          | 1983.09.06 |
| F1983007 | F | Orientalis | Yunnan Baoshan,China          | 1983.09.07 |
| F1983008 | F | Orientalis | Yunnan Longyang,China         | 1983       |
| F1983009 | F | Orientalis | Yunnan Longyang,China         | 1983       |
| F1983010 | F | Orientalis | Yunnan Longyang,China         | 1983       |
| F1983011 | F | Orientalis | Yunnan Ruili,China            | 1983       |
| F1984001 | F | Orientalis | 1.ORI2 Yunnan Yingjiang,China | 1984       |
| F1984004 | F | Orientalis | Yunnan Yingjiang,China        | 1984       |
| F1986003 | F | Orientalis | Yunnan Yingjiang,China        | 1986       |
| F1990002 | F | Orientalis | Yunnan Ruili,China            | 1990       |
| F1990005 | F | Orientalis | Yunnan Yingjiang,China        | 1990       |
| F1990006 | F | Orientalis | Yunnan Yingjiang,China        | 1990       |
| F1990007 | F | Orientalis | Yunnan Yingjiang,China        | 1990       |
| F1990008 | F | Orientalis | Yunnan Dali,China             | 1990       |
| F1990009 | F | Orientalis | Yunnan Dali,China             | 1990       |
| F1990012 | F | Orientalis | Yunnan Lianghe,China          | 1990       |
| F1990014 | F | Orientalis | Yunnan Yingjiang,China        | 1990.10.05 |
| F1990016 | F | Orientalis | Yunnan Longchuan,China        | 1990.11.08 |
| F1990017 | F | Orientalis | Yunnan Lianghe,China          | 1990.11.15 |
| F1990018 | F | Orientalis | Yunnan Lianghe,China          | 1990.11.19 |
| F1990019 | F | Orientalis | Yunnan Lianghe,China          | 1990.11.19 |
| F1990021 | F | Orientalis | Yunnan Gengma,China           | 1990       |
| F1990025 | F | Orientalis | Yunnan Gengma,China           | 1990       |
| F1991001 | F | Orientalis | Yunnan Luoxi,China            | 1991       |
| F1991003 | F | Orientalis | Yunnan Wanting,China          | 1991.06.10 |
| F1991004 | F | Orientalis | Yunnan Wanting,China          | 1991.06.12 |
| F1991007 | F | Orientalis | Myanmar                       | 1991       |
| F1991008 | F | Orientalis | Yunnan Zhenkang,China         | 1991       |
| F1991009 | F | Orientalis | Myanmar                       | 1991       |
| F1991010 | F | Orientalis | Yunnan Yingjiang,China        | 1991       |
| F1991011 | F | Orientalis | Yunnan Gengma,China           | 1991.08.18 |
| F1991012 | F | Orientalis | Yunnan Gengma,China           | 1991       |
| F1991013 | F | Orientalis | Yunnan Longchuan,China        | 1991       |
| F1991014 | F | Orientalis | Yunnan Changyuan,China        | 1991       |
| F1991018 | F | Orientalis | Yunnan Gengma,China           | 1991       |
| F1992003 | F | Orientalis | Yunnan Linchang,China         | 1992       |



|          |   |            |                             |            |
|----------|---|------------|-----------------------------|------------|
| F1991018 | F | Orientalis | Yunnan Gengma,China         | 1991       |
| F1992003 | F | Orientalis | Yunnan Linchang,China       | 1992       |
| F1992004 | F | Orientalis | Yunnan Lanchang,China       | 1992.02.20 |
| F1992005 | F | Orientalis | Yunnan Menghai,China        | 1992       |
| F1992008 | F | Orientalis | Yunnan Yuanjiang,China      | 1992       |
| F1992009 | F | Orientalis | Yunnan Shuangjiang,China    | 1992       |
| F1992014 | F | Orientalis | Yunnan Changyuan,China      | 1992.11.26 |
| F1993001 | F | Orientalis | Yunnan Lanchang,China       | 1993.01.31 |
| F1993002 | F | Orientalis | Yunnan Jinghong,China       | 1993       |
| F1993003 | F | Orientalis | Yunnan Jinghong,China       | 1993       |
| F1994002 | F | Orientalis | Yunnan Tengchong,China      | 1994       |
| F1994004 | F | Orientalis | Yunnan Shidian,China        | 1994       |
| F1994005 | F | Orientalis | Yunnan Shidian,China        | 1994       |
| F1995001 | F | Orientalis | Yunnan Puer,China           | 1995       |
| F1995004 | F | Orientalis | Yunnan Lanchang,China       | 1995       |
| F1995007 | F | Orientalis | Myanmar                     | 1995       |
| F1996003 | F | Orientalis | Yunnan Yunxian,China        | 1996       |
| F1996004 | F | Orientalis | Yunnan Gengma,China         | 1996.05.11 |
| F1996005 | F | Orientalis | Yunnan Gengma,China         | 1996.05.13 |
| F1996006 | F | Orientalis | Yunnan Gengma,China         | 1996       |
| F1996008 | F | Orientalis | Yunnan Mojiang,China        | 1996       |
| F1996010 | F | Orientalis | Yunnan Mojiang,China        | 1996       |
| F1996011 | F | Orientalis | Yunnan Mojiang,China        | 1996       |
| F1996015 | F | Orientalis | Yunnan Lianghe,China        | 1996       |
| F1996016 | F | Orientalis | Yunnan Jianshui,China       | 1996       |
| F1996017 | F | Orientalis | Yunnan Jianshui,China       | 1996       |
| F1996020 | F | Orientalis | Yunnan Gejiu,China          | 1996       |
| F1996022 | F | Orientalis | Yunnan Wenshan,China        | 1996       |
| F1996023 | F | Orientalis | Yunnan Yanshan,China        | 1996       |
| F1996024 | F | Orientalis | Yunnan Shiping,China        | 1996       |
| F1996025 | F | Orientalis | Yunnan Shiping,China        | 1996       |
| F1996026 | F | Orientalis | Yunnan Shiping,China        | 1996       |
| F1996027 | F | Orientalis | Yunnan Shiping,China        | 1996       |
| F1997002 | F | Orientalis | Yunnan Yanshan,China        | 1997       |
| F1997003 | F | Orientalis | Yunnan Yiliang,China        | 1997       |
| F1997004 | F | Orientalis | Yunnan Fumin,China          | 1997       |
| F1997005 | F | Orientalis | Yunnan Fumin,China          | 1997       |
| F1999001 | F | Orientalis | Yunnan Jinghong,China       | 1999       |
| F1999002 | F | Orientalis | Yunnan Mengla,China         | 1999       |
| F1999003 | F | Orientalis | Yunnan Mengla,China         | 1999       |
| F1999007 | F | Orientalis | Yunnan Zhenyuan,China       | 1999       |
| F1999011 | F | Orientalis | Yunnan Zhenyuan,China       | 1999       |
| F2000002 | F | Orientalis | Guizhou Yixing,China        | 2000.08.01 |
| F2000003 | F | Orientalis | Guizhou Yixing,China        | 2000.08.07 |
| F2000004 | F | Orientalis | 1.ORI2 Guizhou Yixing,China | 2000       |
| F2000005 | F | Orientalis | Guizhou Yixing,China        | 2000.08.20 |
| F2000006 | F | Orientalis | Guangxi Longlin,China       | 2000       |
| F2000007 | F | Orientalis | Guangxi Longlin,China       | 2000       |
| F2000008 | F | Orientalis | Guangxi Longlin,China       | 2000       |
| F2000009 | F | Orientalis | Guangxi Longlin,China       | 2000       |
| F2000010 | F | Orientalis | Guangxi Longlin,China       | 2000       |
| F2000011 | F | Orientalis | Guangxi Longlin,China       | 2000       |
| F2001001 | F | Orientalis | Yunnan Simao,China          | 2001       |
| F2001005 | F | Orientalis | Yunnan Yanshan,China        | 2001       |
| F2001006 | F | Orientalis | Yunnan Linchang,China       | 2001       |
| F2001008 | F | Orientalis | Yunnan Fengqing,China       | 2001       |
| F2002001 | F | Orientalis | Yunnan Honghe,China         | 2002       |

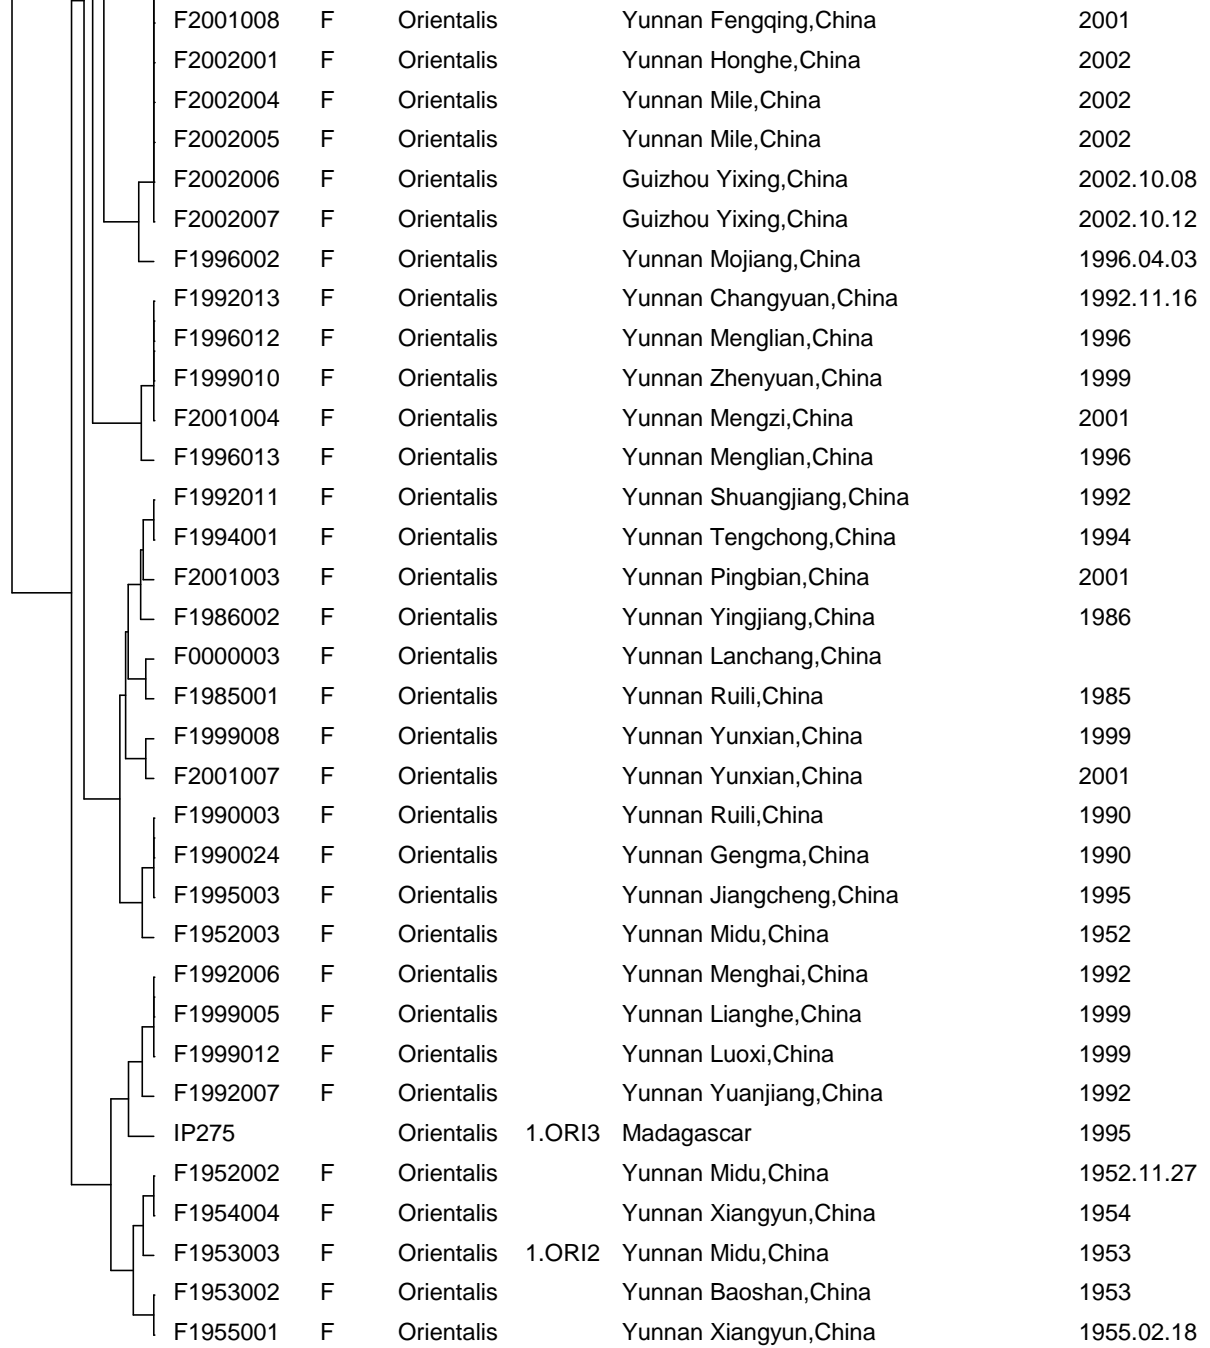

Supplement: pone.0066567.s004.pdf [file pone.0066567.s004.pdf]
