# Supplementary material for: Features of Variable Number of Tandem Repeats in Yersinia pestis and the Development of a Hierarchical Genotyping Scheme
Source: PubMed Central journal article supplement (PMC3689786; doi:10.1371/journal.pone.0066567), 2013-06-21
Supplement: pone.0066567.s002.pdf [file pone.0066567.s002.pdf]

Branch 1

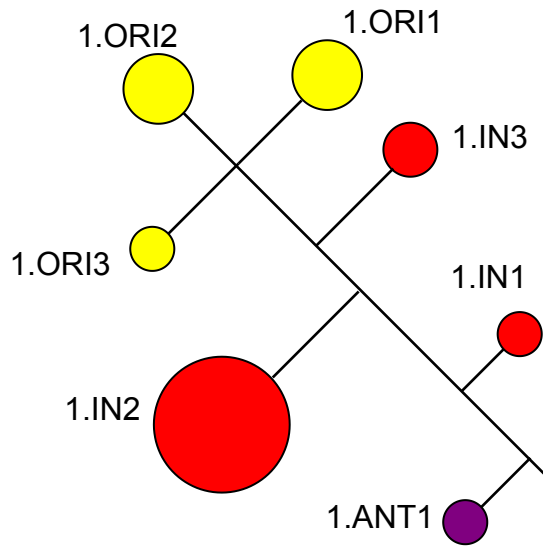

Branch 2

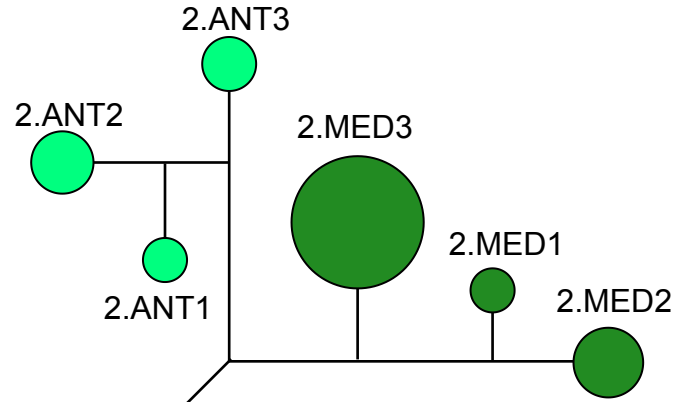

Branch 3

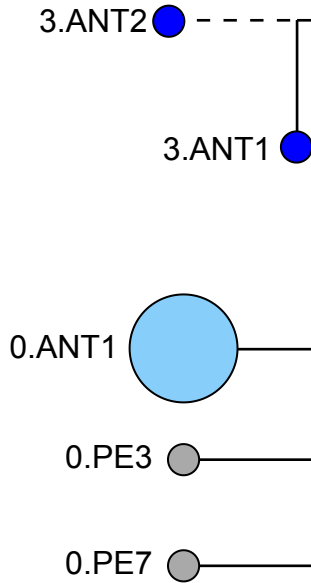

Branch 4

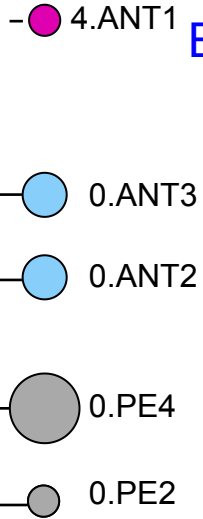

Branch 0

ROOT
