# Supplementary material for: Features of Variable Number of Tandem Repeats in Yersinia pestis and the Development of a Hierarchical Genotyping Scheme
Source: PubMed Central journal article supplement (PMC3689786; doi:10.1371/journal.pone.0066567), 2013-06-21

Categorical  
139 2.MED strains with 15 loci

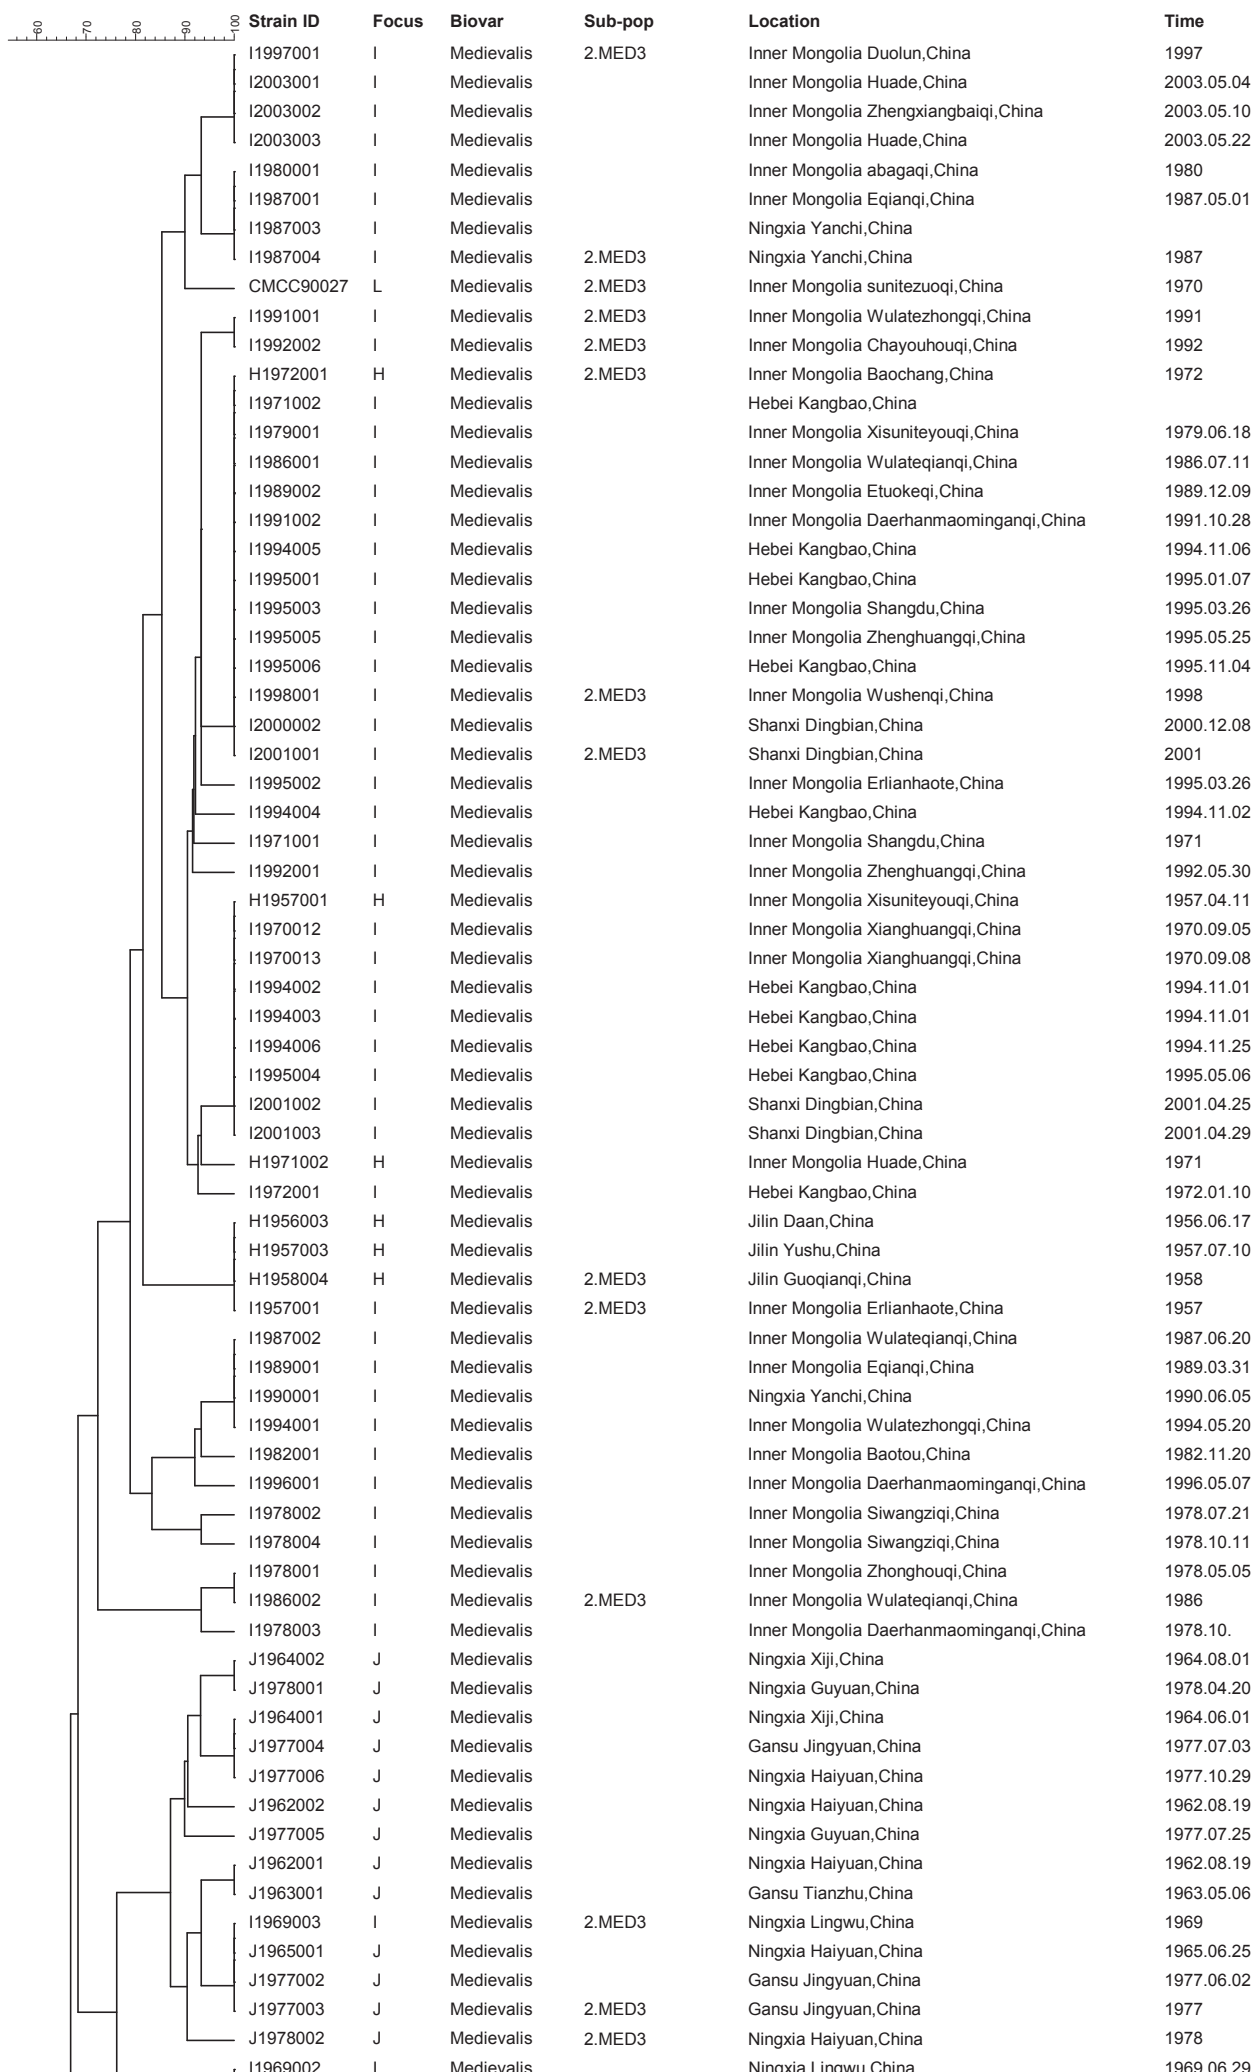

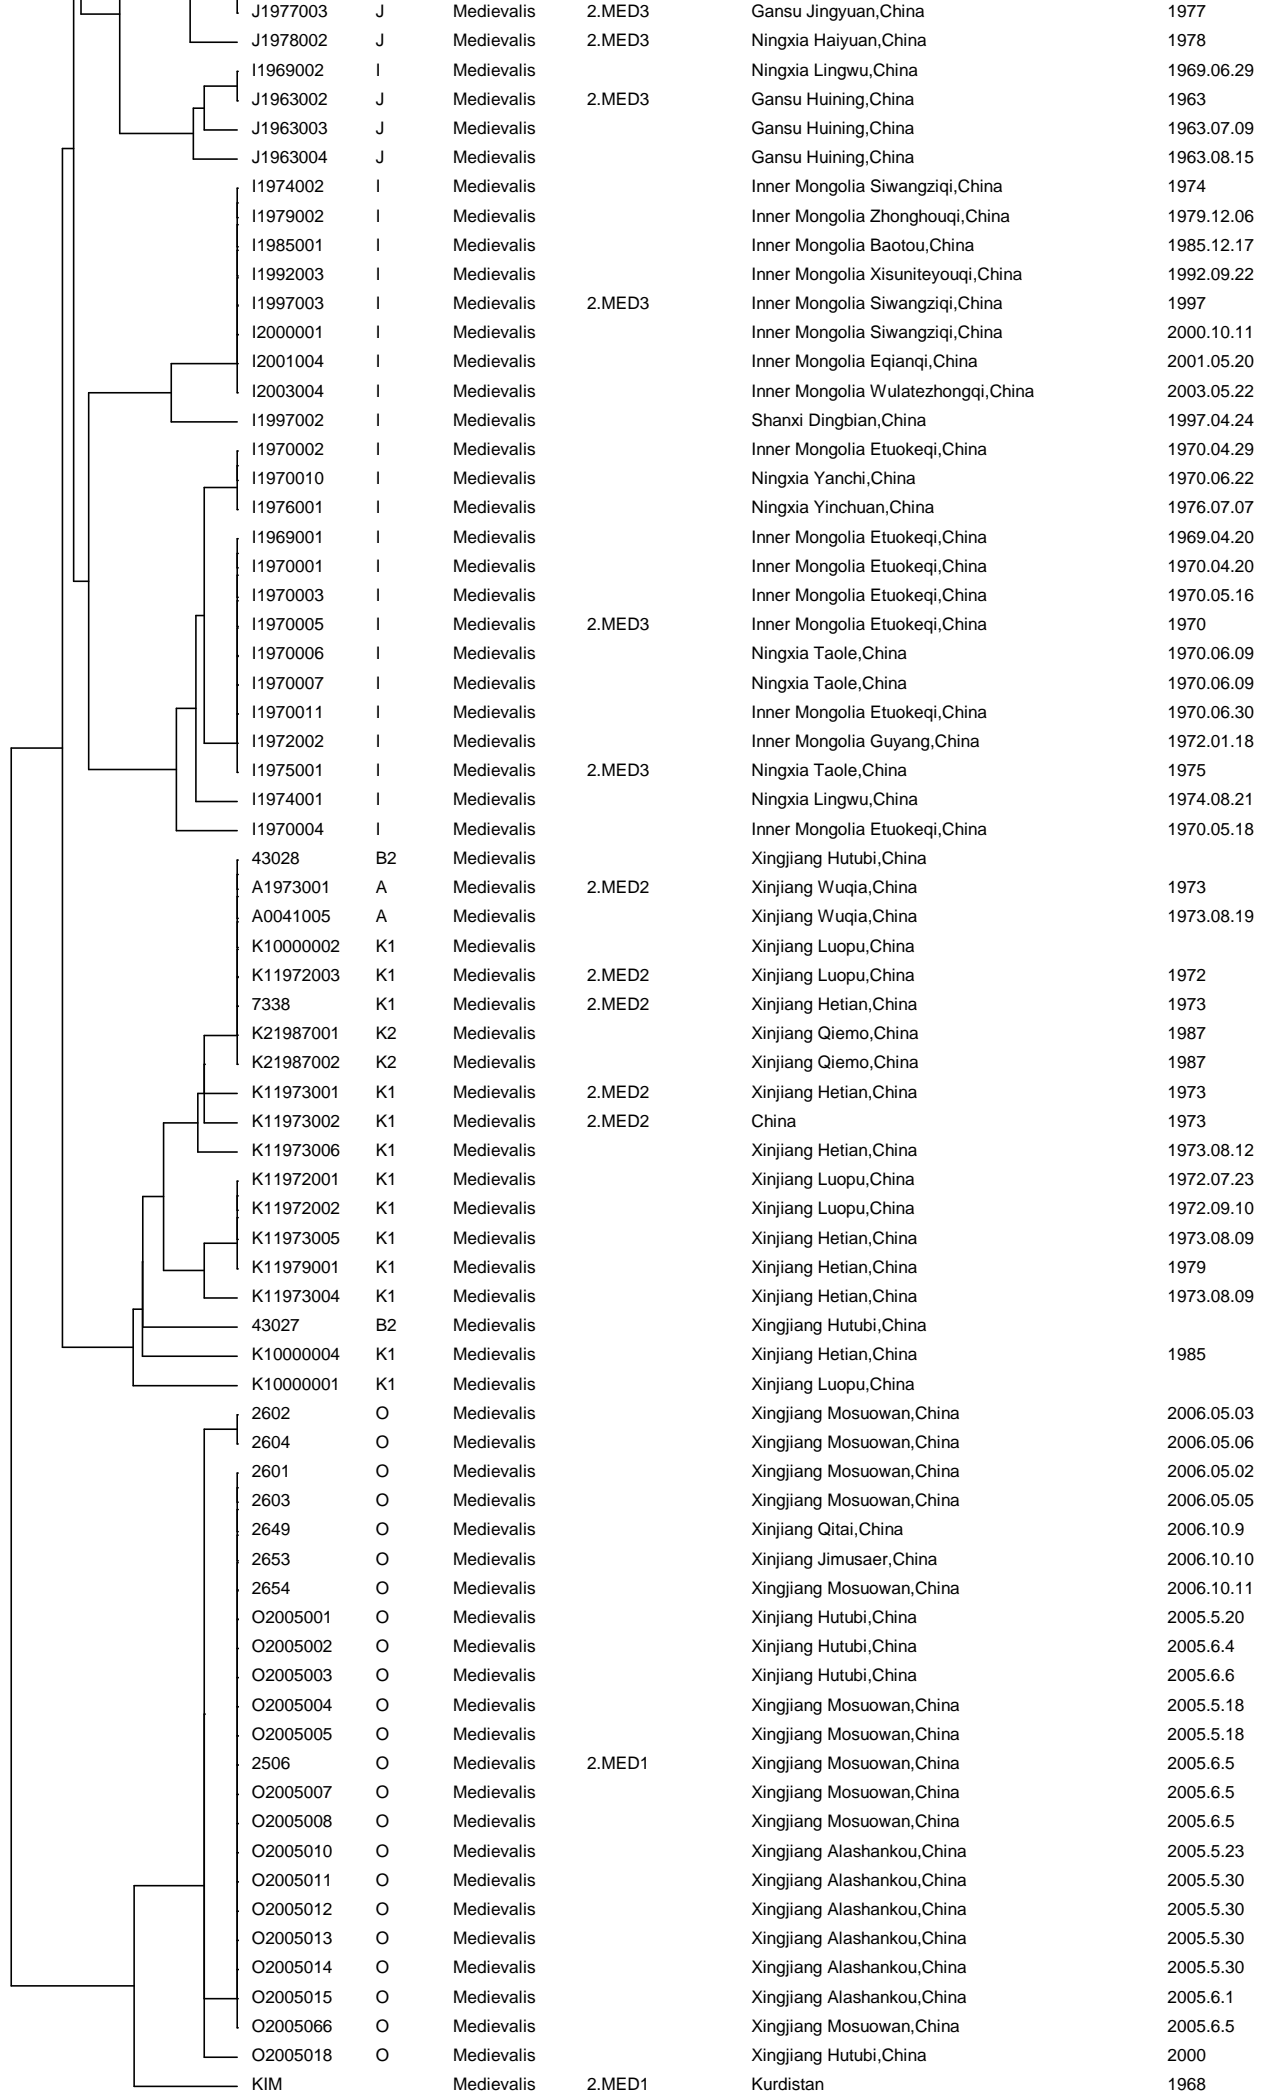

Supplement: pone.0066567.s005.pdf [file pone.0066567.s005.pdf]
