# Supplementary material for: Features of Variable Number of Tandem Repeats in Yersinia pestis and the Development of a Hierarchical Genotyping Scheme
Source: PubMed Central journal article supplement (PMC3689786; doi:10.1371/journal.pone.0066567), 2013-06-21
Supplement: pone.0066567.s007.pdf [file pone.0066567.s007.pdf]

Categorical  
186 0.ANT strains with 17 loci

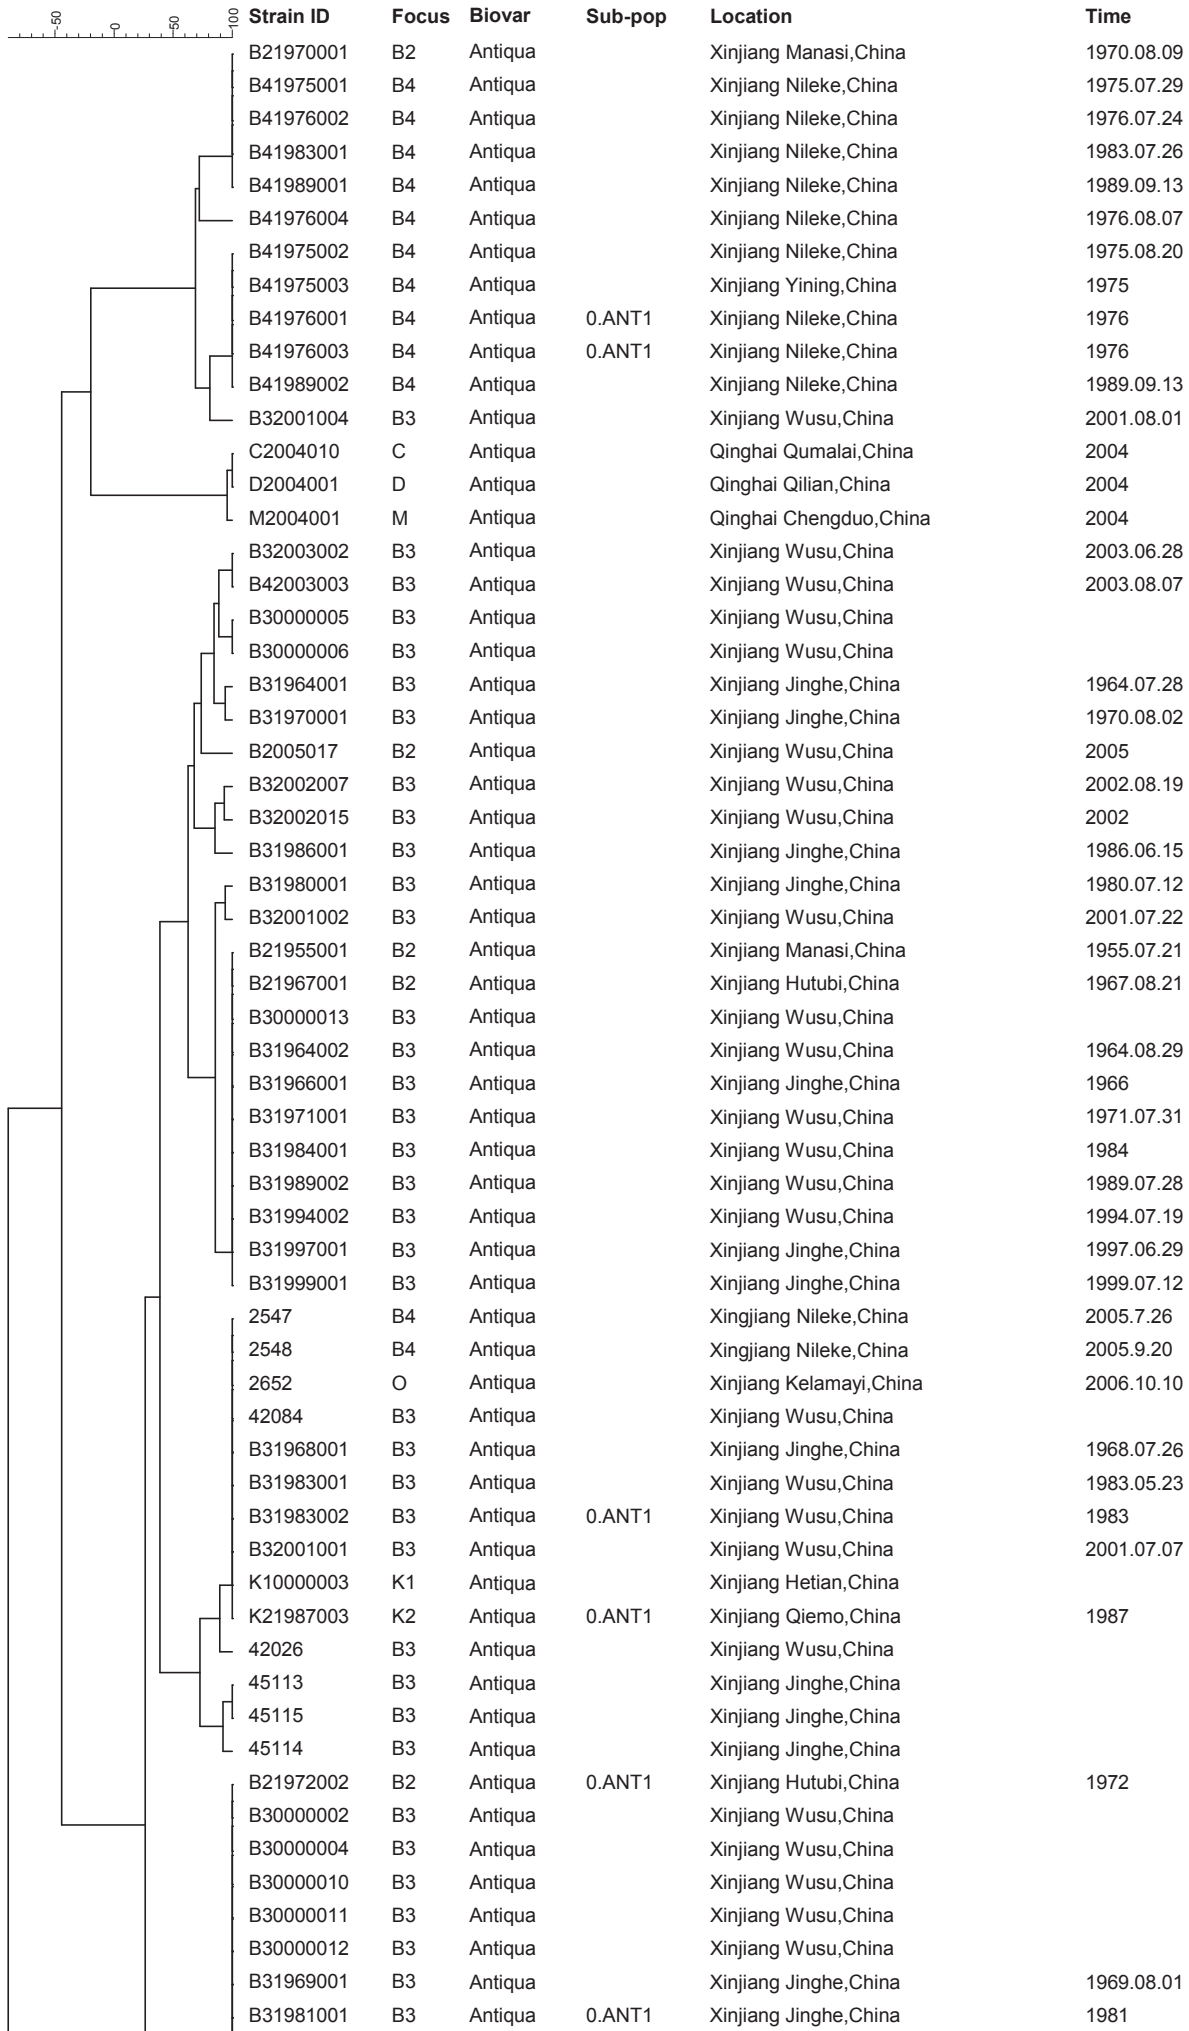

|           |    |         |        |                         |            |
|-----------|----|---------|--------|-------------------------|------------|
| B31969001 | B3 | Antiqua |        | Xinjiang Jinghe,China   | 1969.08.01 |
| B31981001 | B3 | Antiqua | 0.ANT1 | Xinjiang Jinghe,China   | 1981       |
| B31982002 | B3 | Antiqua |        | Xinjiang Jinghe,China   | 1982.10.03 |
| B32002014 | B3 | Antiqua |        | Xinjiang Wusu,China     | 2002.08.25 |
| B32005017 | B3 | Antiqua |        | Xinjiang Wusu,China     | 2005       |
| A1966001  | A  | Antiqua | 0.ANT1 | Xinjiang Wuqia,China    | 1966       |
| B31965001 | B3 | Antiqua | 0.ANT1 | Xinjiang Jinghe,China   | 1965       |
| B31967001 | B3 | Antiqua |        | Xinjiang Wusu,China     | 1967.08.01 |
| B31984002 | B3 | Antiqua |        | Xinjiang Wusu,China     | 1984.08.21 |
| B31987001 | B3 | Antiqua |        | Xinjiang Wusu,China     | 1987.07.21 |
| B30000003 | B3 | Antiqua |        | Xinjiang Wusu,China     |            |
| B30000007 | B3 | Antiqua |        | Xinjiang Wusu,China     |            |
| B30000008 | B3 | Antiqua |        | Xinjiang Wusu,China     |            |
| B30000009 | B3 | Antiqua |        | Xinjiang Wusu,China     |            |
| B22001001 | B2 | Antiqua |        | Xinjiang Changji,China  | 2001.08.29 |
| B21972003 | B2 | Antiqua |        | Xinjiang Manasi,China   | 1972.08.02 |
| B21984001 | B2 | Antiqua |        | Xinjiang Changji,China  | 1984.08.08 |
| B21997001 | B2 | Antiqua |        | Xinjiang Manasi,China   | 1997.07.26 |
| B31967002 | B3 | Antiqua |        | Xinjiang Wusu,China     | 1967.08.08 |
| B31972001 | B3 | Antiqua |        | Xinjiang Jinghe,China   | 1972.07.06 |
| B41999002 | B4 | Antiqua |        | Xinjiang Yining,China   | 1999.07.12 |
| K21985001 | K2 | Antiqua |        | Xinjiang Ruoqiang,China | 1985.07.06 |
| B2040040  | B2 | Antiqua |        | Xinjiang Manasi,China   |            |
| B21959002 | B2 | Antiqua |        | Xinjiang Hutubi,China   | 1959.09.12 |
| B21960001 | B2 | Antiqua |        | Xinjiang Changji,China  | 1960.08.15 |
| B21980003 | B2 | Antiqua |        | Xinjiang Hutubi,China   | 1980.08.28 |
| B21983004 | B2 | Antiqua |        | Xinjiang Wulumuqi,China | 1983.08.20 |
| B21984002 | B2 | Antiqua |        | Xinjiang Changji,China  | 1984.08.08 |
| B21989001 | B2 | Antiqua |        | Xinjiang Changji,China  | 1989.09.28 |
| B21990001 | B2 | Antiqua |        | Xinjiang Wulumuqi,China | 1990.05.23 |
| B31999002 | B3 | Antiqua |        | Xinjiang Wusu,China     | 1999.08.06 |
| 43013     | B2 | Antiqua |        | Xinjiang Hutubi,China   |            |
| B22000002 | B2 | Antiqua |        | Xinjiang Hutubi,China   | 2000.07.29 |
| 44034     | B2 | Antiqua |        | Xinjiang Changji,China  |            |
| B2040060  | B2 | Antiqua |        | Xinjiang Manasi,China   |            |
| B2040061  | B2 | Antiqua |        | Xinjiang Manasi,China   |            |
| B21959001 | B2 | Antiqua | 0.ANT1 | Xinjiang Manasi,China   | 1959       |
| B21961001 | B2 | Antiqua |        | Xinjiang Manasi,China   | 1961.08.19 |
| B21972001 | B2 | Antiqua |        | Xinjiang Hutubi,China   | 1972.07.21 |
| B21979001 | B2 | Antiqua |        | Xinjiang Changji,China  | 1979.08.10 |
| B21980001 | B2 | Antiqua |        | Xinjiang Hutubi,China   | 1980.08.03 |
| B21980002 | B2 | Antiqua |        | Xinjiang Hutubi,China   | 1980.08.07 |
| B21983001 | B2 | Antiqua |        | Xinjiang Changji,China  | 1983       |
| B21983002 | B2 | Antiqua |        | Xinjiang Wulumuqi,China | 1983.07.16 |
| B21983003 | B2 | Antiqua |        | Xinjiang Wulumuqi,China | 1983.07.16 |
| B21984003 | B2 | Antiqua | 0.ANT1 | Xinjiang Changji,China  | 1984       |
| B21987001 | B2 | Antiqua |        | Xinjiang Manasi,China   | 1987.06.12 |
| B21987002 | B2 | Antiqua |        | Xinjiang Manasi,China   | 1987.06.18 |
| B21990002 | B2 | Antiqua |        | Xinjiang Wulumuqi,China | 1990.05.30 |
| CMCC8211  | B3 | Antiqua | 0.ANT1 | Xinjiang Jinghe,China   | 1982       |
| K21985005 | K2 | Antiqua |        | Xinjiang Ruoqiang,China | 1985       |
| B41999001 | B4 | Antiqua |        | Xinjiang Yining,China   | 1999.07.12 |
| B21965001 | B2 | Antiqua |        | Xinjiang Manasi,China   | 1965.08.01 |
| B32001003 | B3 | Antiqua |        | Xinjiang Wusu,China     | 2001.08.01 |
| B20003002 | B2 | Antiqua |        | Xinjiang Wulumuqi,China | 2000       |
| B20003003 | B2 | Antiqua |        | Xinjiang Wulumuqi,China | 2000       |
| B21999001 | B2 | Antiqua |        | Xinjiang Changji,China  | 1999.06.22 |
| B22000003 | B2 | Antiqua |        | Xinjiang Changji,China  | 2000.09.23 |
| B22002001 | B2 | Antiqua |        | Xinjiang Changji,China  | 2002.07.10 |
| B22002003 | B2 | Antiqua |        | Xinjiang Changji,China  | 2002.07.22 |
| B22002007 | B2 | Antiqua |        | Xinjiang Wulumuqi,China | 2002.09.12 |
| B22003003 | B2 | Antiqua |        | Xinjiang Wulumuqi,China | 2003.09.08 |
| B22003004 | B2 | Antiqua |        | Xinjiang Changji,China  | 2003.09.15 |
| B22003005 | B2 | Antiqua |        | Xinjiang Wulumuqi,China | 2003.09.18 |
| B20003001 | B2 | Antiqua |        | Xinjiang Wulumuqi,China | 2000       |
| 44036     | B2 | Antiqua |        | Xinjiang Changji,China  |            |
| B22002004 | B2 | Antiqua |        | Xinjiang Changji,China  | 2002.07.22 |

|           |    |         |        |                         |            |
|-----------|----|---------|--------|-------------------------|------------|
| 44036     | B2 | Antiqua |        | Xinjiang Changji,China  |            |
| B22002004 | B2 | Antiqua |        | Xinjiang Changji,China  | 2002.07.22 |
| B22002002 | B2 | Antiqua |        | Xinjiang Changji,China  | 2002.07.22 |
| B31978001 | B3 | Antiqua |        | Xinjiang Wusu,China     | 1978.09.08 |
| B31989001 | B3 | Antiqua |        | Xinjiang Wusu,China     | 1989.07.24 |
| B31989003 | B3 | Antiqua |        | Xinjiang Shawan,China   | 1989.09.18 |
| B31994001 | B3 | Antiqua |        | Xinjiang Wusu,China     | 1994.06.30 |
| B32002006 | B3 | Antiqua |        | Xinjiang Wusu,China     | 2002.09.05 |
| B32002008 | B3 | Antiqua |        | Xinjiang Shawan,China   | 2002.08.23 |
| B32003001 | B3 | Antiqua |        | Xinjiang Wusu,China     | 2003.06.09 |
| B32002002 | B3 | Antiqua |        | Xinjiang Wusu,China     | 2002       |
| 2655      | O  | Antiqua |        | Xinjiang Kelamayi,China | 2006.10.9  |
| B21992001 | B2 | Antiqua |        | Xinjiang Hutubi,China   | 1992.08.26 |
| B31988002 | B3 | Antiqua |        | Xinjiang Shawan,China   | 1988.08.10 |
| B31988003 | B3 | Antiqua |        | Xinjiang Shawan,China   | 1988.08.12 |
| B31989004 | B3 | Antiqua |        | Xinjiang Shawan,China   | 1993.09.01 |
| 945       | B3 | Antiqua | 0.ANT1 | Xinjiang Shawan,China   | 1994       |
| B32002001 | B3 | Antiqua |        | Xinjiang Wusu,China     | 2002.07.02 |
| B32002003 | B3 | Antiqua |        | Xinjiang Shawan,China   | 2002.08.08 |
| B32002004 | B3 | Antiqua |        | Xinjiang Shawan,China   | 2002.08.08 |
| B22002005 | B2 | Antiqua |        | Xinjiang Manasi,China   | 2002.09.05 |
| B32001006 | B3 | Antiqua |        | Xinjiang Shawan,China   | 2001.08.17 |
| B32002005 | B3 | Antiqua |        | Xinjiang Shawan,China   | 2002.08.08 |
| B32001005 | B3 | Antiqua |        | Xinjiang Shawan,China   | 2001.08.17 |
| B31988004 | B3 | Antiqua |        | Xinjiang Shawan,China   | 1988       |
| B31989005 | B3 | Antiqua |        | Xinjiang Shawan,China   | 1989       |
| B32002016 | B3 | Antiqua |        | Xinjiang Shawan,China   | 2002.08.08 |
| B22002006 | B2 | Antiqua |        | Xinjiang Manasi,China   | 2002.09.05 |
| B32001007 | B3 | Antiqua |        | Xinjiang Shawan,China   | 2001.08.17 |
| 757       |    | Antiqua |        | Hentiy Aymag,Mongolia   | 1981       |
| 3056      |    | Antiqua |        | Bayan-Uul,Mongolia      | 2003       |
| B11996001 | B1 | Antiqua |        | Xinjiang Aheqi,China    | 1996.08.17 |
| B11996002 | B1 | Antiqua |        | Xinjiang Aheqi,China    | 1996.08.17 |
| B11965001 | B1 | Antiqua |        | Xinjiang Aheqi,China    | 1965.07.01 |
| B11992001 | B1 | Antiqua |        | Xinjiang Aheqi,China    | 1992.07.18 |
| B30000001 | B4 | Antiqua |        | Xinjiang Wenquan,China  |            |
| B42003002 | B4 | Antiqua |        | Xinjiang Wenquan,China  | 2003.07.24 |
| B42003001 | B4 | Antiqua |        | Xinjiang Wenquan,China  | 2003.07.15 |
| 2330      | B2 | Antiqua | 0.ANT2 | Xinjiang Wenquan,China  | 2003       |
| B42003004 | B4 | Antiqua | 0.ANT2 | China                   | 2003       |
| A1995001  | A  | Antiqua |        | Xinjiang Wuqia,China    | 1995.07.06 |
| A1996001  | A  | Antiqua |        | Xinjiang Wuqia,China    | 1996.07.07 |
| A1998001  | A  | Antiqua |        | Xinjiang Wuqia,China    | 1998.07.18 |
| A1998002  | A  | Antiqua |        | Xinjiang Wuqia,China    | 1998.07.18 |
| A1997001  | A  | Antiqua |        | Xinjiang Wuqia,China    | 1997.03.31 |
| A1983001  | A  | Antiqua |        | Xinjiang Wuqia,China    | 1983.09.17 |
| A1956001  | A  | Antiqua | 0.ANT3 | Xinjiang Wuqia,China    | 1956       |
| A1960001  | A  | Antiqua |        | Xinjiang Wuqia,China    | 1960.08.28 |
| B11979001 | B1 | Antiqua |        | Xinjiang Atushi,China   | 1979       |
| B11992002 | B1 | Antiqua |        | Xinjiang Atushi,China   | 1992.08.26 |
| B11995001 | B1 | Antiqua |        | Xinjiang Atushi,China   | 1995.08.08 |
| B11995002 | B1 | Antiqua |        | Xinjiang Atushi,China   | 1995.08.08 |
| A0041019  | A  | Antiqua |        | Xinjiang Wuqia,China    |            |
| A1996002  | A  | Antiqua |        | Xinjiang Wuqia,China    | 1996.08.04 |
| A1996003  | A  | Antiqua |        | Xinjiang Wuqia,China    | 1996.08.08 |
| B11989001 | B1 | Antiqua |        | Xinjiang Wuqia,China    | 1989.08.14 |
| B11989002 | B1 | Antiqua |        | Xinjiang Atushi,China   | 1989.09.11 |
| B11989003 | B1 | Antiqua |        | Xinjiang Wuqia,China    | 1989.09.11 |
| B11997001 | B1 | Antiqua |        | Xinjiang Wuqia,China    | 1997.06.29 |
| B12001001 | B1 | Antiqua |        | Xinjiang Wuqia,China    | 2001.07.18 |
| A1992001  | A  | Antiqua | 0.ANT3 | Xinjiang Wuqia,China    | 1992       |
| B12002001 | B1 | Antiqua |        | Xinjiang Wuqia,China    | 2002.07.16 |
| 41022     | A  | Antiqua |        | Xinjiang Wuqia,China    |            |
