# Supplementary material for: Features of Variable Number of Tandem Repeats in Yersinia pestis and the Development of a Hierarchical Genotyping Scheme
Source: PubMed Central journal article supplement (PMC3689786; doi:10.1371/journal.pone.0066567), 2013-06-21
Supplement: pone.0066567.s009.pdf [file pone.0066567.s009.pdf]

Categorical

## 196 1.ORI strains with 18 loci

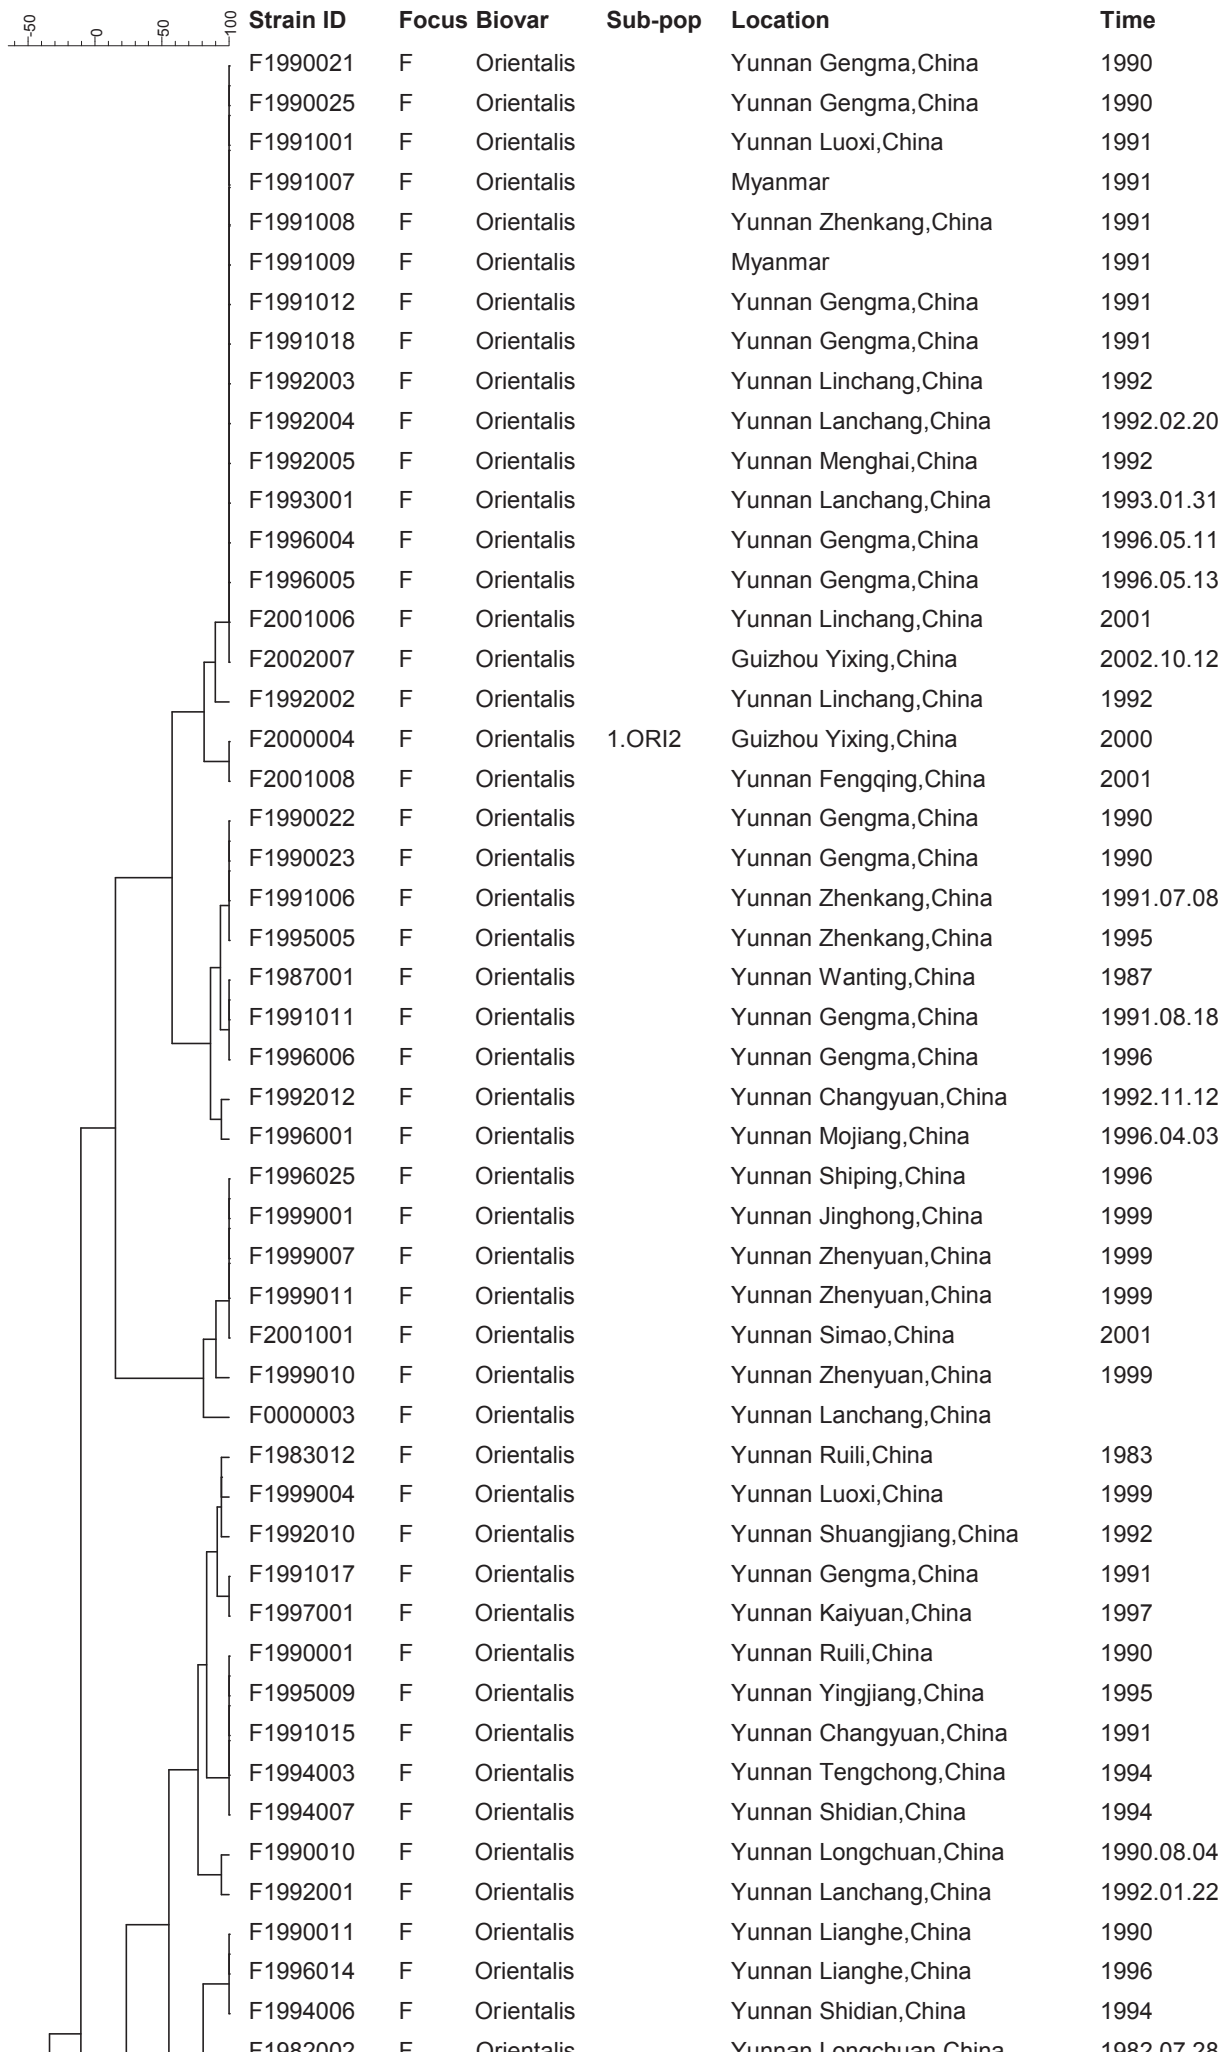

|          |   |            |        |                          |            |
|----------|---|------------|--------|--------------------------|------------|
| F1994006 | F | Orientalis |        | Yunnan Shidian,China     | 1994       |
| F1982002 | F | Orientalis |        | Yunnan Longchuan,China   | 1982.07.28 |
| F1982003 | F | Orientalis |        | Yunnan Ruili,China       | 1982.08.13 |
| F1983006 | F | Orientalis |        | Yunnan Baoshan,China     | 1983.09.06 |
| F1990013 | F | Orientalis |        | Yunnan Yingjiang,China   | 1990.09.18 |
| F1990015 | F | Orientalis |        | Yunnan Lianghe,China     | 1990.11.03 |
| YN663    | F | Orientalis | 1.ORI2 | Yunnan Longchuan,China   | 1982       |
| F1991016 | F | Orientalis | 1.ORI2 | China                    | 1991       |
| F1982001 | F | Orientalis |        | Yunnan Longchuan,China   | 1982.07.28 |
| F1982004 | F | Orientalis |        | Yunnan Ruili,China       | 1982.08.15 |
| F1982005 | F | Orientalis |        | Yunnan Ruili,China       | 1982.08.30 |
| F1982006 | F | Orientalis |        | Yunnan Longchuan,China   | 1982       |
| F1982007 | F | Orientalis |        | Yunnan Ruili,China       | 1982       |
| F1983001 | F | Orientalis |        | Yunnan Ruili,China       | 1983       |
| F1983002 | F | Orientalis |        | Yunnan Ruili,China       | 1983.08.11 |
| F1983003 | F | Orientalis |        | Yunnan Baoshan,China     | 1983.08.24 |
| F1983004 | F | Orientalis |        | Yunnan Ruili,China       | 1983       |
| F1983005 | F | Orientalis |        | Yunnan Baoshan,China     | 1983.09.06 |
| F1983007 | F | Orientalis |        | Yunnan Baoshan,China     | 1983.09.07 |
| F1983008 | F | Orientalis |        | Yunnan Longyang,China    | 1983       |
| F1983009 | F | Orientalis |        | Yunnan Longyang,China    | 1983       |
| F1983010 | F | Orientalis |        | Yunnan Longyang,China    | 1983       |
| F1983011 | F | Orientalis |        | Yunnan Ruili,China       | 1983       |
| F1984001 | F | Orientalis | 1.ORI2 | Yunnan Yingjiang,China   | 1984       |
| F1984004 | F | Orientalis |        | Yunnan Yingjiang,China   | 1984       |
| F1986003 | F | Orientalis |        | Yunnan Yingjiang,China   | 1986       |
| F1990002 | F | Orientalis |        | Yunnan Ruili,China       | 1990       |
| F1990005 | F | Orientalis |        | Yunnan Yingjiang,China   | 1990       |
| F1990006 | F | Orientalis |        | Yunnan Yingjiang,China   | 1990       |
| F1990007 | F | Orientalis |        | Yunnan Yingjiang,China   | 1990       |
| F1990008 | F | Orientalis |        | Yunnan Dali,China        | 1990       |
| F1990009 | F | Orientalis |        | Yunnan Dali,China        | 1990       |
| F1990012 | F | Orientalis |        | Yunnan Lianghe,China     | 1990       |
| F1990014 | F | Orientalis |        | Yunnan Yingjiang,China   | 1990.10.05 |
| F1990016 | F | Orientalis |        | Yunnan Longchuan,China   | 1990.11.08 |
| F1990017 | F | Orientalis |        | Yunnan Lianghe,China     | 1990.11.15 |
| F1990018 | F | Orientalis |        | Yunnan Lianghe,China     | 1990.11.19 |
| F1990019 | F | Orientalis |        | Yunnan Lianghe,China     | 1990.11.19 |
| F1991010 | F | Orientalis |        | Yunnan Yingjiang,China   | 1991       |
| F1991013 | F | Orientalis |        | Yunnan Longchuan,China   | 1991       |
| F1991014 | F | Orientalis |        | Yunnan Changyuan,China   | 1991       |
| F1992008 | F | Orientalis |        | Yunnan Yuanjiang,China   | 1992       |
| F1992009 | F | Orientalis |        | Yunnan Shuangjiang,China | 1992       |
| F1992014 | F | Orientalis |        | Yunnan Changyuan,China   | 1992.11.26 |
| F1994002 | F | Orientalis |        | Yunnan Tengchong,China   | 1994       |
| F1994004 | F | Orientalis |        | Yunnan Shidian,China     | 1994       |
| F1994005 | F | Orientalis |        | Yunnan Shidian,China     | 1994       |
| F1996015 | F | Orientalis |        | Yunnan Lianghe,China     | 1996       |
| F1997002 | F | Orientalis |        | Yunnan Yanshan,China     | 1997       |
| F1992013 | F | Orientalis |        | Yunnan Changyuan,China   | 1992.11.16 |
| F1992006 | F | Orientalis |        | Yunnan Menghai,China     | 1992       |
| F1999005 | F | Orientalis |        | Yunnan Lianghe,China     | 1999       |
| F1999012 | F | Orientalis |        | Yunnan Luoxi,China       | 1999       |
| F1992007 | F | Orientalis |        | Yunnan Yuanjiang,China   | 1992       |
| F1992011 | F | Orientalis |        | Yunnan Shuangjiang,China | 1992       |
| F1994001 | F | Orientalis |        | Yunnan Tengchong,China   | 1994       |

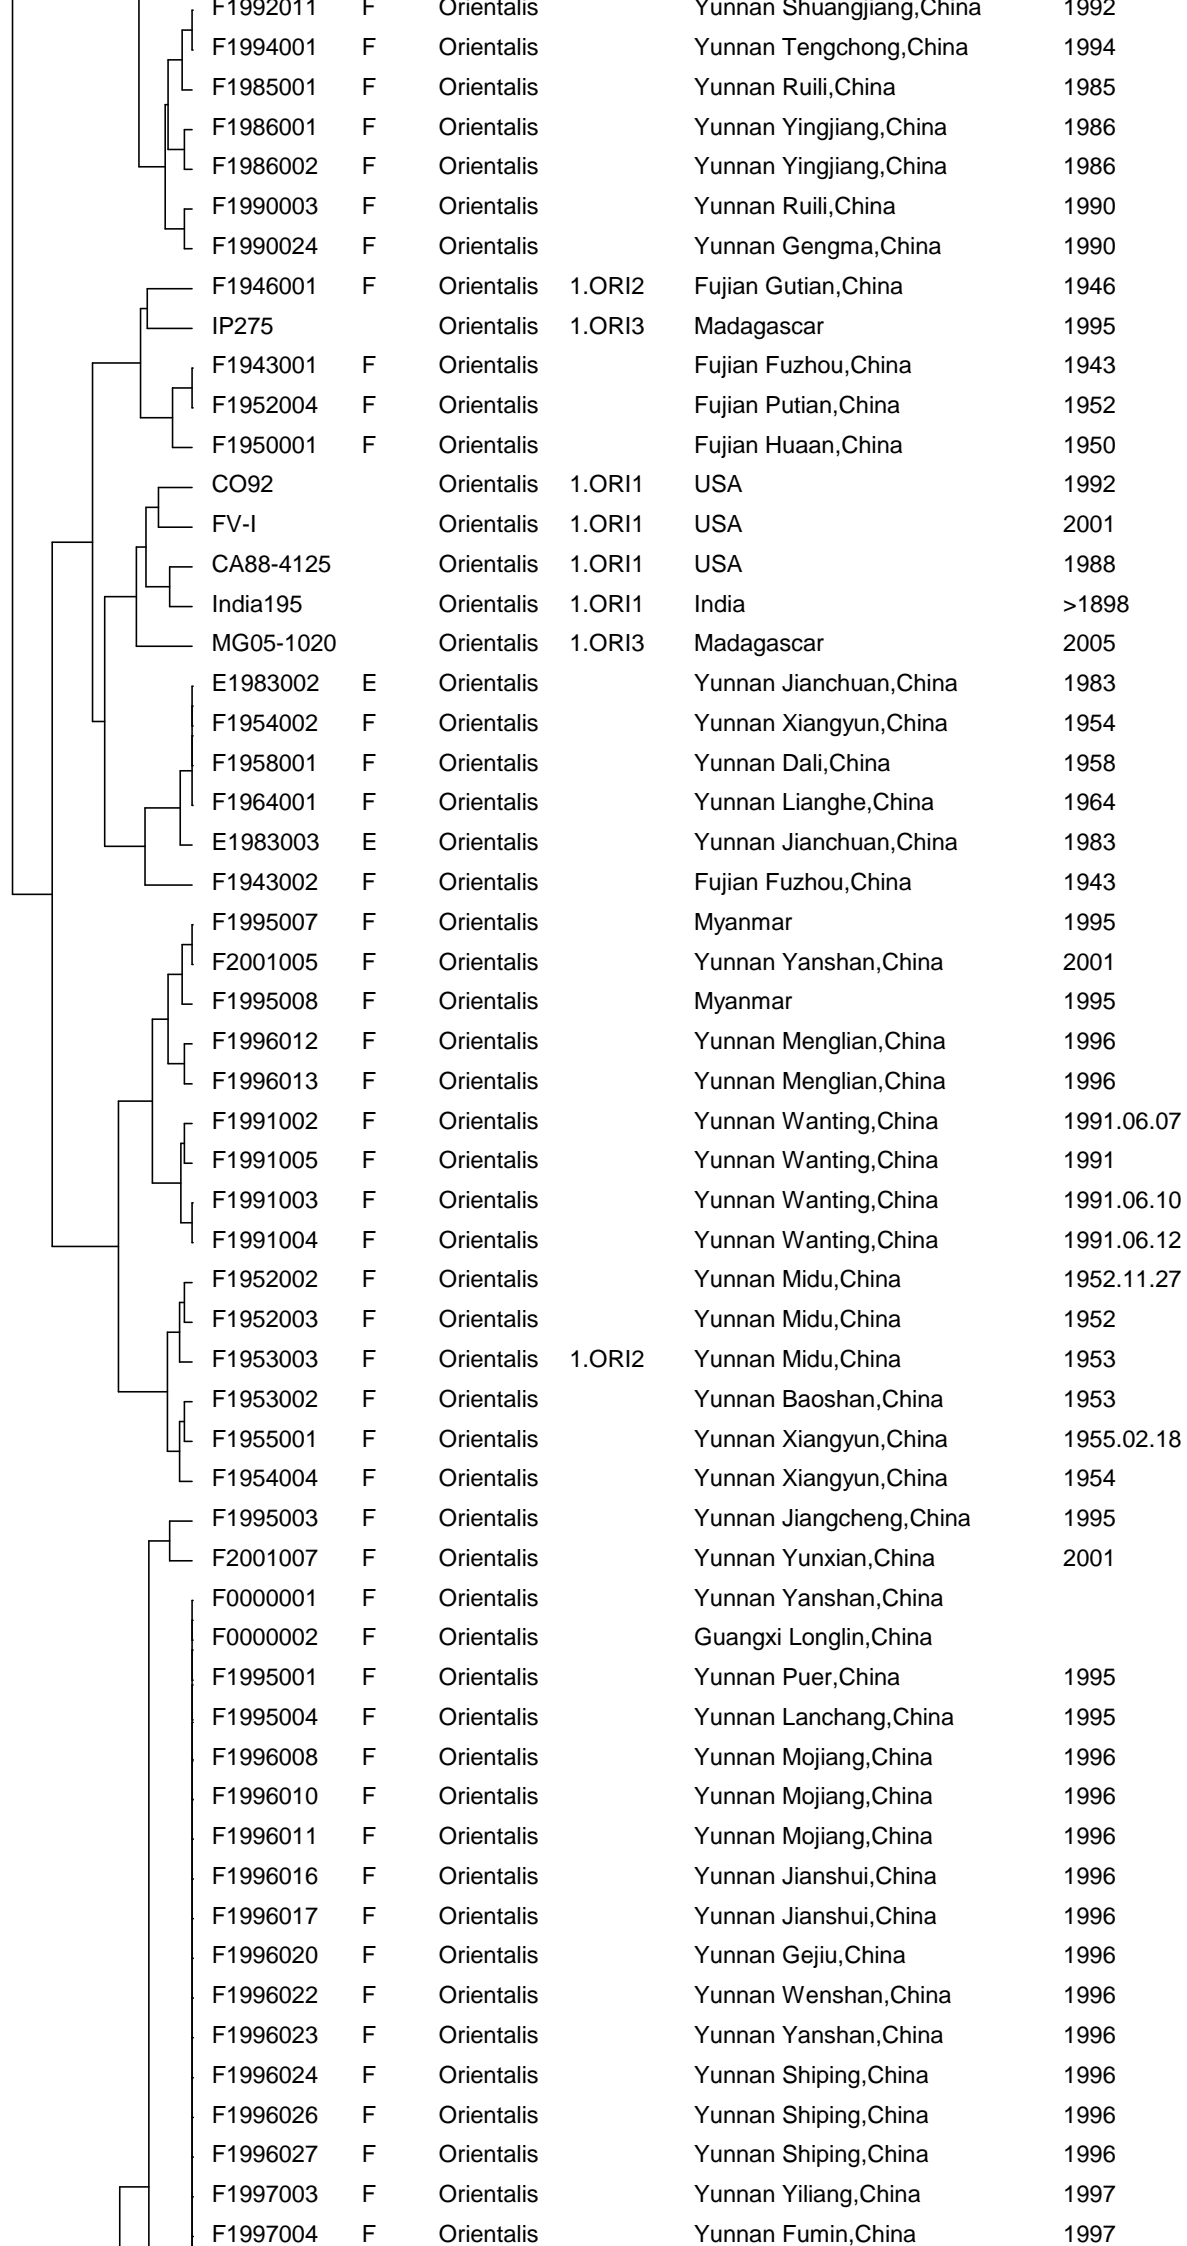

|          |   |            |                       |            |
|----------|---|------------|-----------------------|------------|
| F1997003 | F | Orientalis | Yunnan Yiliang,China  | 1997       |
| F1997004 | F | Orientalis | Yunnan Fumin,China    | 1997       |
| F1997005 | F | Orientalis | Yunnan Fumin,China    | 1997       |
| F2000002 | F | Orientalis | Guizhou Yixing,China  | 2000.08.01 |
| F2000003 | F | Orientalis | Guizhou Yixing,China  | 2000.08.07 |
| F2000006 | F | Orientalis | Guangxi Longlin,China | 2000       |
| F2000007 | F | Orientalis | Guangxi Longlin,China | 2000       |
| F2000008 | F | Orientalis | Guangxi Longlin,China | 2000       |
| F2000009 | F | Orientalis | Guangxi Longlin,China | 2000       |
| F2000010 | F | Orientalis | Guangxi Longlin,China | 2000       |
| F2000011 | F | Orientalis | Guangxi Longlin,China | 2000       |
| F2002004 | F | Orientalis | Yunnan Mile,China     | 2002       |
| F2002005 | F | Orientalis | Yunnan Mile,China     | 2002       |
| F2002002 | F | Orientalis | Yunnan Wenshan,China  | 2002       |
| F1996002 | F | Orientalis | Yunnan Mojiang,China  | 1996.04.03 |
| F1999008 | F | Orientalis | Yunnan Yunxian,China  | 1999       |
| F2001003 | F | Orientalis | Yunnan Pingbian,China | 2001       |
| F2001004 | F | Orientalis | Yunnan Mengzi,China   | 2001       |
| F1996003 | F | Orientalis | Yunnan Yunxian,China  | 1996       |
| F2001002 | F | Orientalis | Yunnan Pingbian,China | 2001       |
| F1993002 | F | Orientalis | Yunnan Jinghong,China | 1993       |
| F1993003 | F | Orientalis | Yunnan Jinghong,China | 1993       |
| F2000005 | F | Orientalis | Guizhou Yixing,China  | 2000.08.20 |
| F2002006 | F | Orientalis | Guizhou Yixing,China  | 2002.10.08 |
| F2002003 | F | Orientalis | Yunnan Yanshan,China  | 2002       |
| F1999002 | F | Orientalis | Yunnan Mengla,China   | 1999       |
| F1999003 | F | Orientalis | Yunnan Mengla,China   | 1999       |
| F2002001 | F | Orientalis | Yunnan Honghe,China   | 2002       |
| F1996021 | F | Orientalis | Yunnan Gejiu,China    | 1996       |
| F1999006 | F | Orientalis | Yunnan Yunxian,China  | 1999       |
| F0000004 | F | Orientalis | Yunnan Mengzi,China   |            |
| F1996009 | F | Orientalis | Yunnan Mojiang,China  | 1996       |
| F1995006 | F | Orientalis | Yunnan Jinggu,China   | 1995       |
| F1999009 | F | Orientalis | Yunnan Honghe,China   | 1999       |
| F1996018 | F | Orientalis | Yunnan Jianshui,China | 1996       |
| F1995002 | F | Orientalis | Yunnan Puer,China     | 1995       |
| F1996007 | F | Orientalis | Yunnan Mojiang,China  | 1996.08.26 |
| F1996019 | F | Orientalis | Yunnan Gejiu,China    | 1996       |
